# Supplementary material for: Mortality prediction in patients with severe septic shock: a pilot study using a target metabolomics approach
Source: PubMed Central journal article supplement (PMC4742912; doi:10.1038/srep20391), 2016-02-05
Supplement: srep20391-s1.pdf [file srep20391-s1.pdf]

## Supplementary Information

### **Mortality prediction in patients with severe septic shock: a pilot study using a target metabolomics approach.**

Manuela Ferrario<sup>1#\*</sup>, Alice Cambiagli<sup>1#</sup>, Laura Brunelli<sup>2#</sup>, Silvia Giordano<sup>2</sup>, Pietro Caironi<sup>3,4</sup>, Luca Guatteri<sup>5</sup>, Ferdinando Raimondi<sup>6</sup>, Luciano Gattinoni<sup>3,4</sup>, Roberto Latini<sup>2</sup>, Serge Masson<sup>2</sup>, Giuseppe Ristagno<sup>2</sup> and Roberta Pastorelli<sup>2\*</sup>

<sup>1</sup> Politecnico di Milano, Milan, Italy

<sup>2</sup> IRCCS-Istituto di Ricerche Farmacologiche Mario Negri, Milan, Italy

<sup>3</sup> Dipartimento di Fisiopatologia Medico-Chirurgica e dei Trapianti, Fondazione IRCCS Ca' Granda – Ospedale Maggiore Policlinico, Università degli Studi di Milano, Milan, Italy

<sup>4</sup> Dipartimento di Anestesia, Rianimazione, ed Emergenza Urgenza, Fondazione IRCCS Ca' Granda – Ospedale Maggiore Policlinico, Università degli Studi di Milano, Milan, Italy

<sup>5</sup> Azienda Ospedaliera di Desio, Desio, Italy

<sup>6</sup> Azienda Ospedaliera Luigi Sacco, Milan, Italy

#### **Supplemental material list:**

Supplemental Methods

Supplemental Table S1

Supplemental Table S2

Supplemental Table S3

Supplemental Table S4

## Supplemental Methods

### Target Metabolomics

Targeted metabolomics analysis of plasma samples was performed using the Biocrates AbsoluteIDQ™ p180 kit (Biocrates Life Science AG, Innsbruck, Austria). This validated targeted assay allows for simultaneous detection and quantification of metabolites in plasma samples (10 microL) in a high-throughput manner. The plasma samples were processed following the instructions by the manufacturer and analyzed on a triple-quadropole mass spectrometer (AB SCIEX triple-quad 5500) operating in the multiple reaction monitoring (MRM-MS) mode. The assay is based on PITC (phenylisothiocyanate)-derivatization in the presence of internal standards for the analysis of aminoacids and biogenic amines resolved and quantified by liquid chromatography- tandem mass spectrometry (LC-MS/MS) using scheduled MRMs. Subsequent flow injection analysis tandem mass spectrometry (FIA-MS/MS) is performed to analyze acylcarnitines, glycerophospholipids, hexose. MRM detection is used for quantification applying spectra parsing algorithm integrated into the MetIQ software (Biocrates Life Science AG, Innsbruck, Austria). Concentrations are calculated and evaluated by comparing measured analytes in a defined extracted ion count section to those of specific labeled internal standards or non-labeled ones, provided by the kit. The measurements are made in a 96-well format. Seven calibration standards, four quality control samples, three zero samples (PBS) and one blank (solvents) are integrated into the plate.

For glycerophospholipids, the precise position of the double bonds and the distribution of the carbon atoms in different fatty acid side chains cannot be determined with this technology. Lipid side-chain composition is abbreviated as C<sub>x</sub>:<sub>y</sub>, where *x* denotes the number of carbons in the side chain and *y* the number of double bonds. The nature of fatty acids linkage is expressed as aa for diacyl or ae for acyl-alkyl. For example, PCaaC32:1 denotes diacyl-phosphatidylcholine with 32 carbons in the two fatty acids side chains and a single double bond in one of them. Triplicate

analysis of plasma samples yielded average coefficient of variance (CV) below 0.09 for the metabolites measured, being the lowest for aminoacids (CV% 0.06) the highest for sphingomyelins (CV% 1.33). The list of all the measurable metabolites is provided below.

## Metabolites measured by MRM-MS

### Acylcarnitines

|                    |                                                         |            |                                 |
|--------------------|---------------------------------------------------------|------------|---------------------------------|
| C 0                | Carnitine                                               | C 10:1     | Decenoylcarnitine               |
| C 2                | Acetylcarnitine                                         | C 10:2     | Decadienylcarnitine             |
| C 3                | Propionylcarnitine                                      | C 12       | Dodecanoylcarnitine             |
| C 3:1              | Propionylcarnitine                                      | C 12:1     | Dodecenoylcarnitine             |
| C 3-OH             | Hydroxypropionylcarnitine                               | C 12-DC    | Dodecanedioylcarnitine          |
| C 4                | Butyrylcarnitine                                        | C 14       | Tetradecanoylcarnitine          |
| C 4:1              | Butenylcarnitine                                        | C 14:1     | Tetradecenoylcarnitine          |
| C 4-OH (C 3-DC)    | Hydroxybutyrylcarnitine                                 | C 14:1 -OH | Hydroxytetradecenoylcarnitine   |
| C 5                | Valerylcarnitine                                        | C 14:2     | Tetradecadienylcarnitine        |
| C 5:1              | Tiglylcarnitine                                         | C 14:2 -OH | Hydroxytetradecadienylcarnitine |
| C 5:1-DC           | Glutacoylcarnitine                                      | C 16       | Hexadecanoylcarnitine           |
| C 5-DC (C 6-OH)    | Glutarylacetyl carnitine*<br>(Hydroxyhexanoylcarnitine) | C 16:1     | Hexadecenoylcarnitine           |
| C 5-M-DC           | Methylglutarylacetyl carnitine                          | C 16:1 -OH | Hydroxyhexadecenoylcarnitine    |
| C 5-OH (C 3-DC -M) | Hydroxyvalerylcarnitine<br>(Methylmalonylcarnitine)     | C 16:2     | Hexadecadienylcarnitine         |
| C 6 (C 4:1 -DC)    | Hexanoylcarnitine (Fumarylacetyl carnitine)             | C 16:2 -OH | Hydroxyhexadecadienylcarnitine  |
| C 6:1              | Hexanoylcarnitine                                       | C 16-OH    | Hydroxyhexadecanoylcarnitine    |
| C 7-DC             | Pimelylcarnitine                                        | C 18       | Octadecanoylcarnitine           |
| C 8                | Octanoylcarnitine                                       | C 18:1     | Octadecenoylcarnitine           |
| C 9                | Nonanoylcarnitine                                       | C 18:1 -OH | Hydroxyoctadecenoylcarnitine    |
| C 10               | Decanoylcarnitine                                       | C 18:2     | Octadecadienylcarnitine         |

### Amino Acids and Biogenic Amines

|     |            |            |                             |
|-----|------------|------------|-----------------------------|
| Ala | Alanine    | Ac-Orn     | Acetylorcarnitine           |
| Arg | Arginine   | ADMA       | Asymmetric dimethylarginine |
| Asn | Asparagine | SDMA       | Symmetric dimethylarginine  |
| Asp | Aspartate  | total DMA  | Total dimethylarginine      |
| Cit | Citrulline | alpha-AAA  | alpha-Amino adipic acid     |
| Gln | Glutamine  | Carnosine  | Carnosine                   |
| Glu | Glutamate  | Creatinine | Creatinine                  |
| Gly | Glycine    | Histamine  | Histamine                   |
| His | Histidine  | Kynurenine | Kynurenine                  |
| Ile | Isoleucine | Met-SO     | Methionine sulfoxide        |
| Leu | Leucine    | Nitro-Tyr  | Nitrotyrosine               |
| Lys | Lysine     | OH-Pro     | Hydroxyproline              |

## Sphingolipids

|               |          |               |               |
|---------------|----------|---------------|---------------|
| SM (OH) C14:1 | SM C18:0 | SM (OH) C22:1 | SM (OH) C24:1 |
| SM C16:0      | SM C18:1 | SM (OH) C22:2 | SM C26:0      |
| SM C16:1      | SM C20:2 | SM C24:0      | SM C26:1      |
| SM (OH) C16:1 | SM C22:3 | SM C24:1      |               |

## Glycerophospholipids

|                |             |             |             |
|----------------|-------------|-------------|-------------|
| lysoPC a C14:0 | PC aa C34:1 | PC aa C42:0 | PC ae C38:2 |
| lysoPC a C16:0 | PC aa C34:2 | PC aa C42:1 | PC ae C38:3 |
| lysoPC a C16:1 | PC aa C34:3 | PC aa C42:2 | PC ae C38:4 |
| lysoPC a C17:0 | PC aa C34:4 | PC aa C42:4 | PC ae C38:5 |
| lysoPC a C18:0 | PC aa C36:0 | PC aa C42:5 | PC ae C38:6 |
| lysoPC a C18:1 | PC aa C36:1 | PC aa C42:6 | PC ae C40:1 |
| lysoPC a C18:2 | PC aa C36:2 | PC ae C30:0 | PC ae C40:2 |
| lysoPC a C20:3 | PC aa C36:3 | PC ae C30:1 | PC ae C40:3 |
| lysoPC a C20:4 | PC aa C36:4 | PC ae C30:2 | PC aa C40:4 |
| lysoPC a C24:0 | PC aa C36:5 | PC ae C32:1 | PC ae C40:5 |
| lysoPC a C26:0 | PC aa C36:6 | PC ae C32:2 | PC ae C40:6 |
| lysoPC a C26:1 | PC aa C38:0 | PC ae C34:0 | PC ae C42:0 |
| lysoPC a C28:0 | PC aa C38:1 | PC ae C34:1 | PC ae C42:1 |
| lysoPC a C28:1 | PC aa C38:3 | PC ae C34:2 | PC ae C42:2 |
| PC aa C24:0    | PC aa C38:4 | PC ae C34:3 | PC ae C42:3 |
| PC aa C26:0    | PC aa C38:5 | PC ae C36:0 | PC ae C42:4 |
| PC aa C28:1    | PC aa C38:6 | PC ae C36:1 | PC ae C42:5 |
| PC aa C30:0    | PC aa C40:1 | PC ae C36:2 | PC ae C44:3 |
| PC aa C30:2    | PC aa C40:2 | PC ae C36:3 | PC ae C44:4 |
| PC aa C32:0    | PC aa C40:3 | PC ae C36:4 | PC ae C44:5 |
| PC aa C32:1    | PC aa C40:4 | PC ae C36:5 | PC ae C44:6 |
| PC aa C32:2    | PC aa C40:5 | PC ae C38:0 |             |
| PC aa C32:3    | PC aa C40:6 | PC ae C38:1 |             |

## Hexoses

H1

Hexose

**Table S1** – Plasma concentration ( $\mu\text{M}$ ) of quantified metabolites at day 1 for each patient. Survival status at 28 days and 90 days is also reported (S, survivor; NS, non survivor).

| Metabolite D1   | #1     | #2     | #3     | #4     | #5     | #6     | #7     | #8     | #9     | #10    | #11    | #12    | #13    | #14    | #15    | #16    | #17    | #18    | #19    | #20    |
|-----------------|--------|--------|--------|--------|--------|--------|--------|--------|--------|--------|--------|--------|--------|--------|--------|--------|--------|--------|--------|--------|
| 28 day survival | S      | S      | NS     | NS     | NS     | NS     | S      | S      | S      | S      | NS     | NS     | S      | S      | S      | NS     | NS     | S      | NS     | S      |
| 90 day survival | NS     | S      | NS     | NS     | NS     | NS     | S      | NS     | S      | S      | NS     | NS     | S      | S      | S      | NS     | NS     | S      | NS     | S      |
| LPC a C16:0     | 12.308 | 7.528  | 13.655 | 4.899  | 28.277 | 5.527  | 5.857  | 126.81 | 29.717 | 6.368  | 10.370 | 4.339  | 28.175 | 5.650  | 20.493 | 13.126 | 17.885 | 29.495 | 4.883  | 26.565 |
| LPC a C16:1     | 0.467  | 0.310  | 0.587  | 0.304  | 0.604  | 0.250  | 0.308  | 3.733  | 0.900  | 0.315  | 0.305  | 0.313  | 1.213  | 0.390  | 0.972  | 0.643  | 0.514  | 0.966  | 0.244  | 0.657  |
| LPC a C17:0     | 0.233  | 0.160  | 0.245  | 0.134  | 0.371  | 0.127  | 0.108  | 1.497  | 0.418  | 0.121  | 0.129  | 0.129  | 0.389  | 0.105  | 0.466  | 0.398  | 0.259  | 0.434  | 0.124  | 0.413  |
| LPC a C18:0     | 2.965  | 1.698  | 3.869  | 1.810  | 4.715  | 1.546  | 1.933  | 27.255 | 11.051 | 1.620  | 1.944  | 1.607  | 6.423  | 1.501  | 6.753  | 2.707  | 4.094  | 7.320  | 1.311  | 4.364  |
| LPC a C18:1     | 2.303  | 1.917  | 4.377  | 2.778  | 3.995  | 1.936  | 1.707  | 32.610 | 6.319  | 2.273  | 2.470  | 2.570  | 4.382  | 1.504  | 3.997  | 7.747  | 3.395  | 4.625  | 1.827  | 3.481  |
| LPC a C18:2     | 1.591  | 1.716  | 3.163  | 3.908  | 3.172  | 1.509  | 1.432  | 18.028 | 3.972  | 1.454  | 1.807  | 2.068  | 3.218  | 1.438  | 2.005  | 9.460  | 2.774  | 2.922  | 1.163  | 2.186  |
| LPC a C20:3     | 0.411  | 0.302  | 0.520  | 0.331  | 0.299  | 0.291  | 0.289  | 2.082  | 0.558  | 0.152  | 0.243  | 0.276  | 0.471  | 0.174  | 0.292  | 0.619  | 0.392  | 0.257  | 0.258  | 0.305  |
| LPC a C20:4     | 0.663  | 0.700  | 1.741  | 0.799  | 1.194  | 0.577  | 0.535  | 5.442  | 1.584  | 0.596  | 0.473  | 0.657  | 2.074  | 0.544  | 1.104  | 1.881  | 1.038  | 1.252  | 0.316  | 2.752  |
| LPC a C24:0     | 0.048  | 0.053  | 0.082  | 0.057  | 0.045  | 0.066  | 0.046  | 0.061  | 0.053  | 0.054  | 0.037  | 0.047  | 0.071  | 0.048  | 0.061  | 0.067  | 0.068  | 0.077  | 0.040  | 0.086  |
| LPC a C28:1     | 0.095  | 0.162  | 0.102  | 0.124  | 0.090  | 0.153  | 0.094  | 0.062  | 0.061  | 0.078  | 0.083  | 0.072  | 0.190  | 0.063  | 0.103  | 0.106  | 0.101  | 0.119  | 0.077  | 0.099  |
| PC aa C28:1     | 1.389  | 2.372  | 1.758  | 1.827  | 0.869  | 2.359  | 1.825  | 0.900  | 0.816  | 1.934  | 1.365  | 1.117  | 2.762  | 1.332  | 1.512  | 1.095  | 2.396  | 1.671  | 1.171  | 2.178  |
| PC aa C30:0     | 2.389  | 3.149  | 2.706  | 3.148  | 1.256  | 3.640  | 5.623  | 1.167  | 1.693  | 3.472  | 2.373  | 2.814  | 2.980  | 2.887  | 2.058  | 1.453  | 3.100  | 2.226  | 3.411  | 2.643  |
| PC aa C30:2     | 0.005  | 0.005  | 0.099  | 0.108  | 0.028  | 0.176  | 0.005  | 0.033  | 0.165  | 0.230  | 0.008  | 0.140  | 0.005  | 0.005  | 0.005  | 0.020  | 0.168  | 0.005  | 0.005  | 0.005  |
| PC aa C32:0     | 125.63 | 145.25 | 152.50 | 201.59 | 77.721 | 339.95 | 366.3  | 83.603 | 103.32 | 189.38 | 155.58 | 235.21 | 97.08  | 134.58 | 139.87 | 104.56 | 263.13 | 145.31 | 217.59 | 195.19 |
| PC aa C32:1     | 175.49 | 387.71 | 243.72 | 264.33 | 101.97 | 557.74 | 533.68 | 73.621 | 70.221 | 429.29 | 323.01 | 154.92 | 219.93 | 182.03 | 132.69 | 134.79 | 465.12 | 209.55 | 250.07 | 172.21 |
| PC aa C32:2     | 18.334 | 22.073 | 19.708 | 19.061 | 12.173 | 37.801 | 32.218 | 6.500  | 12.095 | 39.112 | 23.987 | 9.939  | 30.387 | 16.521 | 11.947 | 18.256 | 22.541 | 27.910 | 12.636 | 19.743 |
| PC aa C32:3     | 1.673  | 2.732  | 2.250  | 2.391  | 1.479  | 4.049  | 3.210  | 1.984  | 1.012  | 3.571  | 1.484  | 1.075  | 2.983  | 1.737  | 2.629  | 2.030  | 1.827  | 2.228  | 0.964  | 1.986  |
| PC aa C34:1     | 1584.8 | 2322.5 | 1804.6 | 2344.6 | 1056.3 | 4074.2 | 2217.3 | 1087.6 | 600.8  | 2545.8 | 2812.2 | 1013.5 | 1447.9 | 1164.4 | 1388.1 | 1624.9 | 2375.4 | 1775   | 1409.2 | 1661.9 |
| PC aa C34:2     | 2349.6 | 3045.5 | 1704.7 | 3347.7 | 2149.6 | 4671.1 | 3375.5 | 1433.5 | 928.1  | 3276.5 | 3433.3 | 931.9  | 2392.6 | 1389.3 | 1287.6 | 2117   | 2797.5 | 3341.8 | 1325.1 | 2298   |
| PC aa C34:3     | 51.173 | 98.632 | 48.719 | 75.752 | 33.495 | 120.78 | 83.246 | 38.054 | 23.517 | 100.05 | 64.923 | 26.346 | 74.940 | 47.897 | 47.652 | 65.334 | 64.763 | 83.148 | 38.526 | 48.659 |
| PC aa C34:4     | 3.307  | 5.312  | 4.037  | 2.872  | 2.095  | 4.766  | 3.737  | 2.406  | 2.708  | 5.947  | 2.938  | 1.645  | 9.618  | 2.826  | 2.782  | 3.562  | 4.398  | 5.129  | 1.938  | 5.721  |
| PC aa C36:0     | 1.486  | 4.641  | 5.288  | 7.027  | 2.357  | 4.430  | 5.752  | 4.437  | 4.251  | 6.877  | 4.446  | 5.199  | 5.451  | 2.891  | 4.766  | 3.062  | 6.544  | 8.008  | 1.715  | 4.045  |
| PC aa C36:1     | 121.6  | 154.6  | 139.3  | 232.01 | 52.396 | 335.15 | 186.60 | 85.354 | 69.877 | 178.84 | 158.00 | 117.35 | 119.84 | 98.012 | 147.02 | 140.12 | 188.34 | 112.81 | 128.58 | 75.463 |
| PC aa C36:2     | 603.85 | 721.80 | 584.86 | 1265.3 | 399.78 | 1459.6 | 1136.4 | 454.66 | 411.66 | 1016.2 | 855.12 | 519.71 | 638.13 | 405.03 | 550.31 | 512.62 | 804.17 | 931.95 | 464.08 | 401.14 |
| PC aa C36:3     | 370.84 | 399.26 | 258.87 | 354.73 | 191.27 | 527.96 | 444.36 | 402.46 | 194.57 | 473.05 | 274.33 | 197.27 | 349.44 | 132.2  | 208.79 | 198.01 | 304.45 | 431.07 | 204.73 | 222    |
| PC aa C36:4     | 493.08 | 850.02 | 587.42 | 461.56 | 378.87 | 748.64 | 494.9  | 391.95 | 289.18 | 827.64 | 480.13 | 204.40 | 1022.2 | 315.94 | 447.4  | 343.51 | 745.61 | 884.69 | 198.14 | 1476.7 |

|             |        |        |        |        |        |        |        |        |        |        |        |        |        |        |        |        |        |        |        |        |
|-------------|--------|--------|--------|--------|--------|--------|--------|--------|--------|--------|--------|--------|--------|--------|--------|--------|--------|--------|--------|--------|
| PC aa C36:5 | 39.923 | 61.006 | 30.019 | 23.315 | 13.704 | 51.738 | 31.281 | 24.106 | 13.360 | 66.059 | 20.593 | 19.447 | 57.214 | 20.384 | 97.671 | 31.324 | 34.486 | 51.571 | 13.582 | 47.169 |
| PC aa C36:6 | 1.407  | 2.466  | 1.920  | 1.698  | 0.795  | 2.575  | 1.938  | 1.173  | 1.140  | 2.425  | 1.245  | 0.884  | 3.024  | 1.474  | 2.110  | 1.356  | 1.717  | 2.343  | 0.662  | 1.682  |
| PC aa C38:0 | 2.226  | 2.305  | 2.960  | 3.885  | 1.430  | 4.069  | 5.301  | 4.472  | 3.923  | 2.923  | 2.382  | 6.375  | 5.042  | 1.612  | 4.919  | 2.572  | 9.338  | 4.225  | 2.258  | 2.129  |
| PC aa C38:1 | 0.820  | 0.525  | 1.216  | 1.844  | 1.001  | 2.315  | 0.810  | 0.141  | 1.098  | 0.975  | 0.633  | 1.025  | 1.674  | 0.716  | 0.490  | 0.910  | 1.579  | 0.757  | 0.813  | 0.256  |
| PC aa C38:3 | 68.015 | 77.979 | 61.634 | 74.542 | 29.689 | 91.442 | 83.003 | 76.352 | 53.123 | 70.838 | 42.068 | 39.549 | 82.685 | 30.194 | 62.894 | 31.884 | 60.488 | 81.985 | 40.770 | 39.979 |
| PC aa C38:4 | 158.71 | 225.15 | 222.29 | 207.45 | 85.147 | 272.42 | 205.39 | 142.02 | 149.82 | 277.66 | 125.64 | 110.57 | 293.81 | 110.77 | 190.25 | 111.68 | 221.36 | 309.24 | 74.429 | 333.7  |
| PC aa C38:5 | 70.061 | 85.475 | 84.263 | 65.633 | 32.458 | 104.18 | 67.953 | 72.708 | 48.878 | 116.95 | 39.687 | 47.965 | 108.13 | 34.525 | 91.693 | 42.411 | 96.910 | 112.49 | 32.115 | 118.88 |
| PC aa C38:6 | 124.29 | 151.25 | 130.43 | 107.44 | 42.870 | 179.09 | 164.02 | 159.75 | 97.381 | 165.71 | 92.206 | 47.896 | 201.79 | 60.326 | 176.61 | 85.280 | 160.48 | 216.08 | 48.033 | 166.68 |
| PC aa C40:1 | 0.483  | 0.549  | 0.585  | 0.556  | 0.414  | 0.637  | 0.630  | 0.704  | 0.488  | 0.823  | 0.593  | 0.554  | 0.555  | 0.516  | 0.559  | 0.462  | 0.637  | 0.783  | 0.637  | 0.676  |
| PC aa C40:2 | 0.451  | 0.614  | 0.749  | 0.498  | 0.500  | 0.616  | 0.654  | 0.911  | 0.457  | 0.588  | 0.423  | 0.769  | 0.587  | 0.467  | 0.532  | 0.571  | 0.698  | 0.618  | 0.555  | 0.303  |
| PC aa C40:3 | 0.371  | 0.667  | 1.036  | 0.561  | 0.355  | 0.843  | 0.603  | 1.106  | 0.672  | 0.684  | 0.292  | 0.701  | 0.767  | 0.294  | 0.466  | 0.355  | 0.553  | 0.858  | 0.522  | 0.434  |
| PC aa C40:4 | 2.958  | 3.269  | 4.572  | 4.441  | 1.420  | 4.827  | 3.809  | 4.647  | 4.624  | 3.622  | 2.116  | 3.674  | 5.610  | 1.462  | 2.481  | 2.008  | 7.131  | 4.343  | 2.457  | 3.699  |
| PC aa C40:5 | 8.385  | 10.263 | 12.545 | 14.314 | 2.800  | 15.016 | 8.517  | 8.464  | 9.158  | 12.808 | 4.878  | 6.765  | 11.513 | 4.236  | 7.303  | 3.990  | 13.734 | 12.040 | 4.499  | 12.757 |
| PC aa C40:6 | 26.427 | 32.802 | 32.229 | 34.639 | 6.075  | 44.442 | 47.902 | 35.123 | 30.557 | 36.449 | 17.527 | 16.328 | 37.586 | 15.448 | 56.784 | 20.068 | 34.306 | 50.493 | 12.272 | 29.166 |
| PC aa C42:0 | 0.151  | 0.263  | 0.280  | 0.357  | 0.154  | 0.517  | 0.439  | 0.353  | 0.285  | 0.483  | 0.417  | 0.451  | 0.482  | 0.223  | 0.451  | 0.300  | 0.486  | 0.590  | 0.170  | 0.342  |
| PC aa C42:1 | 0.178  | 0.177  | 0.217  | 0.221  | 0.189  | 0.459  | 0.408  | 0.302  | 0.247  | 0.229  | 0.181  | 0.255  | 0.253  | 0.166  | 0.188  | 0.157  | 0.248  | 0.269  | 0.173  | 0.135  |
| PC aa C42:2 | 0.049  | 0.206  | 0.193  | 0.063  | 0.139  | 0.314  | 0.195  | 0.226  | 0.096  | 0.155  | 0.211  | 0.219  | 0.262  | 0.079  | 0.179  | 0.135  | 0.147  | 0.313  | 0.139  | 0.186  |
| PC aa C42:4 | 0.153  | 0.170  | 0.239  | 0.130  | 0.084  | 0.215  | 0.268  | 0.491  | 0.128  | 0.272  | 0.219  | 0.191  | 0.162  | 0.117  | 0.161  | 0.093  | 0.186  | 0.206  | 0.109  | 0.177  |
| PC aa C42:5 | 0.159  | 0.128  | 0.226  | 0.340  | 0.111  | 0.266  | 0.379  | 0.427  | 0.393  | 0.279  | 0.154  | 0.334  | 0.393  | 0.077  | 0.247  | 0.228  | 0.653  | 0.288  | 0.066  | 0.332  |
| PC aa C42:6 | 0.188  | 0.237  | 0.226  | 0.258  | 0.273  | 0.621  | 0.246  | 0.465  | 0.362  | 0.397  | 0.266  | 0.403  | 0.620  | 0.221  | 0.428  | 0.373  | 0.533  | 0.519  | 0.296  | 0.380  |
| PC ae C30:0 | 0.208  | 0.213  | 0.200  | 0.231  | 0.111  | 0.305  | 0.366  | 0.103  | 0.172  | 0.261  | 0.200  | 0.291  | 0.282  | 0.184  | 0.165  | 0.174  | 0.265  | 0.191  | 0.247  | 0.167  |
| PC ae C30:1 | 0.048  | 0.021  | 0.068  | 0.110  | 0.016  | 0.190  | 0.198  | 0.036  | 0.137  | 0.132  | 0.087  | 0.088  | 0.143  | 0.040  | 0.016  | 0.022  | 0.043  | 0.165  | 0.030  | 0.016  |
| PC ae C30:2 | 0.027  | 0.050  | 0.049  | 0.067  | 0.037  | 0.082  | 0.057  | 0.037  | 0.025  | 0.082  | 0.040  | 0.039  | 0.090  | 0.041  | 0.054  | 0.042  | 0.061  | 0.065  | 0.033  | 0.046  |
| PC ae C32:1 | 14.280 | 17.536 | 16.370 | 16.047 | 8.658  | 44.269 | 38.957 | 13.577 | 19.899 | 24.500 | 22.312 | 22.393 | 19.308 | 13.037 | 12.768 | 12.146 | 28.848 | 20.119 | 19.215 | 11.951 |
| PC ae C32:2 | 3.492  | 4.676  | 4.615  | 2.955  | 3.097  | 10.287 | 9.239  | 3.487  | 5.021  | 4.658  | 4.071  | 4.992  | 4.447  | 2.944  | 4.092  | 2.703  | 4.320  | 5.110  | 3.726  | 3.041  |
| PC ae C34:0 | 6.010  | 8.938  | 9.172  | 11.232 | 3.288  | 13.467 | 13.169 | 3.831  | 4.944  | 8.602  | 6.521  | 8.239  | 7.454  | 6.799  | 7.193  | 4.333  | 9.530  | 6.781  | 11.044 | 8.493  |
| PC ae C34:1 | 59.345 | 91.884 | 57.706 | 94.780 | 37.345 | 161.03 | 96.857 | 37.168 | 31.174 | 89.234 | 76.397 | 72.656 | 67.511 | 50.353 | 58.168 | 54.251 | 116.15 | 64.332 | 85.099 | 48.770 |
| PC ae C34:2 | 30.843 | 39.549 | 36.643 | 42.661 | 27.443 | 79.058 | 51.112 | 23.379 | 26.421 | 52.360 | 37.443 | 31.261 | 55.551 | 26.123 | 27.954 | 32.540 | 41.329 | 50.719 | 33.998 | 26.470 |
| PC ae C34:3 | 11.642 | 13.078 | 21.353 | 11.268 | 12.379 | 29.502 | 32.199 | 11.010 | 16.469 | 18.320 | 14.850 | 17.602 | 32.352 | 8.764  | 12.847 | 8.398  | 14.292 | 21.928 | 13.514 | 12.399 |
| PC ae C36:0 | 4.992  | 4.635  | 5.793  | 5.768  | 1.775  | 7.515  | 7.033  | 3.120  | 3.523  | 5.868  | 5.956  | 2.877  | 3.632  | 7.036  | 4.830  | 3.720  | 3.085  | 5.994  | 4.265  | 3.338  |
| PC ae C36:1 | 29.941 | 43.497 | 39.038 | 37.140 | 27.466 | 54.561 | 37.123 | 28.793 | 18.660 | 36.182 | 30.313 | 19.698 | 29.252 | 23.200 | 29.011 | 24.944 | 28.293 | 33.901 | 25.893 | 26.845 |
| PC ae C36:2 | 43.487 | 64.015 | 35.759 | 52.477 | 33.030 | 77.027 | 50.009 | 25.175 | 20.270 | 58.283 | 38.212 | 29.291 | 42.687 | 23.138 | 36.213 | 34.134 | 41.595 | 50.694 | 32.622 | 29.728 |

|             |        |        |        |        |        |        |        |        |        |        |        |        |        |        |        |        |        |        |        |        |
|-------------|--------|--------|--------|--------|--------|--------|--------|--------|--------|--------|--------|--------|--------|--------|--------|--------|--------|--------|--------|--------|
| PC ae C36:3 | 14.084 | 20.314 | 17.322 | 22.522 | 11.601 | 34.720 | 22.569 | 14.781 | 14.192 | 23.113 | 17.890 | 19.134 | 24.602 | 9.548  | 13.856 | 13.165 | 23.080 | 25.537 | 16.286 | 11.038 |
| PC ae C36:4 | 24.844 | 23.849 | 38.104 | 41.962 | 21.971 | 45.786 | 36.338 | 35.296 | 41.119 | 37.012 | 29.261 | 52.329 | 75.743 | 16.416 | 25.940 | 23.133 | 117.05 | 53.210 | 24.699 | 41.916 |
| PC ae C36:5 | 16.904 | 17.619 | 31.034 | 14.035 | 15.546 | 37.990 | 25.894 | 24.506 | 34.383 | 23.300 | 19.552 | 31.923 | 47.710 | 10.697 | 19.977 | 14.435 | 44.546 | 39.704 | 16.212 | 31.474 |
| PC ae C38:0 | 2.358  | 2.619  | 2.225  | 2.290  | 1.075  | 2.875  | 2.633  | 2.977  | 1.364  | 3.277  | 1.470  | 1.085  | 4.119  | 1.370  | 2.857  | 1.712  | 2.167  | 3.970  | 1.137  | 2.600  |
| PC ae C38:1 | 0.962  | 1.581  | 2.576  | 1.930  | 2.290  | 3.165  | 2.683  | 3.920  | 3.042  | 1.471  | 1.081  | 1.831  | 2.314  | 0.824  | 2.221  | 0.700  | 1.763  | 1.801  | 0.749  | 0.624  |
| PC ae C38:2 | 3.398  | 3.793  | 5.813  | 4.104  | 3.602  | 7.418  | 4.425  | 9.470  | 4.498  | 3.191  | 2.567  | 3.679  | 4.231  | 2.388  | 3.472  | 2.330  | 3.586  | 3.782  | 3.108  | 1.618  |
| PC ae C38:3 | 7.427  | 9.649  | 15.910 | 7.321  | 11.125 | 11.154 | 8.716  | 20.970 | 10.635 | 8.633  | 4.590  | 5.779  | 12.360 | 5.081  | 7.722  | 4.186  | 7.128  | 9.700  | 5.051  | 6.025  |
| PC ae C38:4 | 18.290 | 24.382 | 23.727 | 23.153 | 12.506 | 26.568 | 19.971 | 21.008 | 21.815 | 26.491 | 16.909 | 21.605 | 35.245 | 11.415 | 18.894 | 14.348 | 39.869 | 29.861 | 14.514 | 31.591 |
| PC ae C38:5 | 18.666 | 17.771 | 30.943 | 26.187 | 17.462 | 38.287 | 24.921 | 43.366 | 36.651 | 26.705 | 20.822 | 53.775 | 47.643 | 11.568 | 29.397 | 18.318 | 81.208 | 39.133 | 22.989 | 25.559 |
| PC ae C38:6 | 6.289  | 6.977  | 10.131 | 10.361 | 4.427  | 14.132 | 12.927 | 10.553 | 11.348 | 10.549 | 6.521  | 13.899 | 17.990 | 5.176  | 12.950 | 6.433  | 18.704 | 14.710 | 5.726  | 9.082  |
| PC ae C40:1 | 0.372  | 0.668  | 1.116  | 0.413  | 0.600  | 1.076  | 0.702  | 2.090  | 1.294  | 1.069  | 0.466  | 0.897  | 1.354  | 0.268  | 0.611  | 0.718  | 0.683  | 1.270  | 0.224  | 0.911  |
| PC ae C40:2 | 1.462  | 1.823  | 1.760  | 1.540  | 1.467  | 1.922  | 2.044  | 2.920  | 1.353  | 1.576  | 1.397  | 1.162  | 2.108  | 1.054  | 2.467  | 1.355  | 1.032  | 1.775  | 1.088  | 1.699  |
| PC ae C40:3 | 1.215  | 1.315  | 4.203  | 1.456  | 2.233  | 2.616  | 1.883  | 6.073  | 4.185  | 1.337  | 0.851  | 1.119  | 2.358  | 0.908  | 1.764  | 0.839  | 1.294  | 1.494  | 1.053  | 1.297  |
| PC ae C40:4 | 1.633  | 1.730  | 3.998  | 2.296  | 1.748  | 3.000  | 2.259  | 5.218  | 3.742  | 2.479  | 1.925  | 2.597  | 4.118  | 1.363  | 2.013  | 1.980  | 3.277  | 3.357  | 1.595  | 2.621  |
| PC ae C40:5 | 2.802  | 2.709  | 7.592  | 3.927  | 3.081  | 5.564  | 3.743  | 14.475 | 7.973  | 3.662  | 2.883  | 5.829  | 7.389  | 1.576  | 4.099  | 2.043  | 7.971  | 5.360  | 2.907  | 3.349  |
| PC ae C40:6 | 3.953  | 4.262  | 4.566  | 5.080  | 1.558  | 6.282  | 5.172  | 5.118  | 4.665  | 4.614  | 2.439  | 5.469  | 6.248  | 2.615  | 7.153  | 3.116  | 9.964  | 7.388  | 2.695  | 4.177  |
| PC ae C42:0 | 0.680  | 0.808  | 1.056  | 0.778  | 0.749  | 1.148  | 0.873  | 1.040  | 0.795  | 0.842  | 0.977  | 0.796  | 0.742  | 0.743  | 0.776  | 0.596  | 0.842  | 0.978  | 0.566  | 0.748  |
| PC ae C42:1 | 0.381  | 0.533  | 0.773  | 0.519  | 0.344  | 0.647  | 0.516  | 0.762  | 0.556  | 0.499  | 0.353  | 0.531  | 0.686  | 0.251  | 0.504  | 0.354  | 0.581  | 0.712  | 0.341  | 0.546  |
| PC ae C42:2 | 0.213  | 0.305  | 0.384  | 0.264  | 0.175  | 0.534  | 0.439  | 0.485  | 0.392  | 0.478  | 0.293  | 0.301  | 0.489  | 0.185  | 0.571  | 0.142  | 0.253  | 0.283  | 0.262  | 0.191  |
| PC ae C42:3 | 0.288  | 0.258  | 0.573  | 0.357  | 0.531  | 0.691  | 0.479  | 1.689  | 0.797  | 0.693  | 0.495  | 0.442  | 0.651  | 0.296  | 0.488  | 0.323  | 0.551  | 0.704  | 0.276  | 0.690  |
| PC ae C42:4 | 0.379  | 0.336  | 0.607  | 0.367  | 0.183  | 0.738  | 0.272  | 0.504  | 0.721  | 0.261  | 0.268  | 0.588  | 0.524  | 0.278  | 0.351  | 0.211  | 0.461  | 0.677  | 0.252  | 0.305  |
| PC ae C42:5 | 1.138  | 0.618  | 1.954  | 0.982  | 0.695  | 1.685  | 1.364  | 3.349  | 2.265  | 1.146  | 0.902  | 1.959  | 2.178  | 0.834  | 1.353  | 0.953  | 1.818  | 1.839  | 0.974  | 1.216  |
| PC ae C44:3 | 0.086  | 0.066  | 0.249  | 0.128  | 0.116  | 0.107  | 0.212  | 0.382  | 0.108  | 0.098  | 0.096  | 0.116  | 0.202  | 0.105  | 0.091  | 0.058  | 0.240  | 0.178  | 0.115  | 0.061  |
| PC ae C44:4 | 0.287  | 0.106  | 0.148  | 0.052  | 0.089  | 0.221  | 0.121  | 0.423  | 0.187  | 0.153  | 0.171  | 0.123  | 0.168  | 0.086  | 0.195  | 0.098  | 0.140  | 0.148  | 0.093  | 0.184  |
| PC ae C44:5 | 0.422  | 0.312  | 0.389  | 0.419  | 0.270  | 0.710  | 0.573  | 0.587  | 0.752  | 0.416  | 0.468  | 0.771  | 0.755  | 0.277  | 0.459  | 0.312  | 0.685  | 0.661  | 0.379  | 0.348  |
| PC ae C44:6 | 0.298  | 0.310  | 0.408  | 0.271  | 0.186  | 0.803  | 0.462  | 0.478  | 0.709  | 0.418  | 0.289  | 0.637  | 0.579  | 0.251  | 0.520  | 0.266  | 0.577  | 1.041  | 0.403  | 0.247  |
| Sugars      | 4430.6 | 3860.5 | 5173.6 | 5106.3 | 7982.6 | 5473.1 | 5216.2 | 7194.9 | 7265.3 | 6874.3 | 8156.6 | 6474.9 | 7770.9 | 4941.7 | 8043.4 | 6111.5 | 10401  | 6787.8 | 11334  | 8207.7 |
| Ala         | 165    | 80.7   | 604    | 353    | 132    | 207    | 1080   | 405    | 579    | 213    | 217    | 713    | 193    | 171    | 351    | 208    | 304    | 214    | 908    | 527    |
| Arg         | 73     | 36.5   | 8.2    | 77.3   | 51.8   | 37.3   | 179    | 98.7   | 26     | 62.4   | 60.7   | 155    | 76     | 28.7   | 132    | 38.3   | 112    | 79.7   | 343    | 62.4   |
| Asn         | 45.2   | 30.8   | 2.11   | 60.8   | 27.9   | 41.6   | 190    | 74.6   | 104    | 44     | 4.67   | 194    | 36.3   | 19.6   | 32.1   | 47.1   | 77.8   | 51.4   | 78.7   | 50.2   |
| Asp         | 7.7    | 10.9   | 11.4   | 9.22   | 12.2   | 13.9   | 50.1   | 14.5   | 30.7   | 8      | 34.1   | 15.5   | 11.3   | 7.96   | 13.9   | 5.63   | 6.19   | 5.98   | 44.3   | 24.4   |
| Cit         | 17.2   | 3.67   | 8.38   | 12.3   | 3.42   | 10.8   | 33     | 29.1   | 40.5   | 3.92   | 5.06   | 55.4   | 5.07   | 5.12   | 4.58   | 7.64   | 15.2   | 9.52   | 45.8   | 3.92   |

|                    |       |        |       |       |       |       |       |       |        |       |       |        |       |       |       |       |       |       |       |       |
|--------------------|-------|--------|-------|-------|-------|-------|-------|-------|--------|-------|-------|--------|-------|-------|-------|-------|-------|-------|-------|-------|
| <b>Gln</b>         | 716   | 293    | 427   | 822   | 22.1  | 775   | 2390  | 853   | 544    | 429   | 283   | 2050   | 389   | 156   | 429   | 463   | 1230  | 371   | 1580  | 413   |
| <b>Glu</b>         | 31.1  | 21.7   | 163   | 16.8  | 250   | 61.8  | 146   | 109   | 846    | 22.5  | 74.9  | 69     | 150   | 27.6  | 159   | 20    | 99.2  | 15.7  | 78.2  | 36.2  |
| <b>Gly</b>         | 155   | 83.9   | 250   | 171   | 156   | 212   | 722   | 245   | 575    | 135   | 147   | 888    | 182   | 148   | 368   | 136   | 183   | 138   | 868   | 204   |
| <b>His</b>         | 105   | 56.6   | 120   | 170   | 54.3  | 97.6  | 353   | 112   | 139    | 110   | 86.2  | 225    | 145   | 79.1  | 134   | 99.1  | 115   | 70.4  | 213   | 98.2  |
| <b>Ile</b>         | 62.6  | 36.2   | 57.9  | 70.2  | 62.4  | 52.4  | 145   | 151   | 190    | 58.1  | 122   | 76.4   | 58.9  | 30    | 98.4  | 42.1  | 92.1  | 73.6  | 184   | 48.6  |
| <b>Leu</b>         | 130   | 77     | 129   | 135   | 120   | 116   | 267   | 280   | 316    | 133   | 235   | 123    | 93.3  | 68.6  | 156   | 99.6  | 204   | 159   | 318   | 126   |
| <b>Lys</b>         | 291   | 160    | 277   | 411   | 212   | 131   | 764   | 472   | 1060   | 237   | 261   | 766    | 215   | 114   | 300   | 158   | 311   | 257   | 613   | 276   |
| <b>Met</b>         | 14.7  | 13.4   | 45.9  | 37.8  | 20.1  | 25.9  | 175   | 56.4  | 170    | 23.9  | 23    | 392    | 12.6  | 12.2  | 46.1  | 19.1  | 35.3  | 20.6  | 204   | 40.9  |
| <b>Orn</b>         | 83.3  | 27     | 155   | 63.1  | 40.8  | 57    | 237   | 126   | 485    | 50.2  | 64.5  | 166    | 41.9  | 31.5  | 214   | 24.3  | 70.8  | 79.3  | 344   | 74.1  |
| <b>Phe</b>         | 105   | 64     | 206   | 129   | 101   | 112   | 339   | 139   | 386    | 213   | 128   | 289    | 166   | 289   | 236   | 119   | 178   | 103   | 442   | 113   |
| <b>Pro</b>         | 114   | 50.7   | 169   | 228   | 92    | 128   | 14    | 271   | 554    | 110   | 75.2  | 1050   | 87    | 47.4  | 201   | 61.3  | 369   | 78.5  | 704   | 114   |
| <b>Ser</b>         | 37.8  | 38.3   | 64.3  | 35.2  | 82.3  | 46    | 161   | 155   | 145    | 34.1  | 53    | 100    | 35.8  | 32.7  | 116   | 33    | 73.9  | 37.1  | 190   | 71.7  |
| <b>Thr</b>         | 50    | 41.1   | 120   | 76.8  | 52.6  | 55.3  | 3     | 180   | 236    | 62.3  | 54.5  | 335    | 73.6  | 39    | 110   | 52.4  | 99.3  | 77.3  | 213   | 105   |
| <b>Trp</b>         | 19.5  | 14.9   | 55.8  | 16.5  | 29.1  | 10.7  | 45.1  | 114   | 195    | 26.5  | 24.5  | 40.4   | 10.8  | 8.320 | 82.4  | 9.490 | 13.7  | 27.9  | 76    | 47.2  |
| <b>Tyr</b>         | 50.2  | 29.7   | 97.1  | 72.7  | 79.8  | 77.1  | 179   | 187   | 343    | 135   | 46.5  | 239    | 43    | 25.3  | 65.6  | 47.5  | 138   | 60.2  | 159   | 87.6  |
| <b>Val</b>         | 189   | 123    | 229   | 222   | 199   | 181   | 425   | 531   | 559    | 261   | 518   | 260    | 207   | 141   | 403   | 224   | 366   | 333   | 941   | 256   |
| <b>Ac Orn</b>      | 0.672 | 0.086  | 0.919 | 0.378 | 0.105 | 0.339 | 1.470 | 0.367 | 0.689  | 0.559 | 0.442 | 1.260  | 0.168 | 0.240 | 0.635 | 0.250 | 0.387 | 0.568 | 0.513 | 0.305 |
| <b>ADMA</b>        | 0.503 | 0.147  | 0.210 | 0.436 | 0.402 | 0.542 | 1.290 | 0.633 | 2.770  | 0.800 | 0.411 | 2.400  | 0.561 | 0.332 | 0.528 | 0.485 | 1.820 | 0.591 | 1.950 | 0.437 |
| <b>Alpha AAA</b>   | 1.510 | 0.564  | 3.130 | 1.120 | 1.410 | 1.480 | 7.630 | 1.520 | 5.460  | 0.708 | 0.673 | 1.900  | 1.030 | 0.719 | 0.924 | 1.410 | 0.545 | 1.420 | 1.180 | 0.896 |
| <b>Creatinine</b>  | 230   | 38.200 | 329   | 142   | 51.8  | 231   | 250   | 87.5  | 172    | 274   | 194   | 315    | 418   | 276   | 215   | 114   | 140   | 289   | 117   | 118   |
| <b>DOPA</b>        | 0.220 | 0.040  | 0.442 | 0.146 | 0.040 | 0.131 | 0.492 | 0.206 | 0.342  | 0.173 | 0.105 | 0.338  | 0.040 | 0.114 | 0.203 | 0.118 | 0.218 | 0.136 | 0.481 | 0.295 |
| <b>Kynurenine</b>  | 5.880 | 2.390  | 19    | 8.660 | 5.680 | 7.440 | 13.8  | 5.8   | 20.3   | 10.2  | 8.730 | 13.4   | 27    | 21.3  | 12.3  | 13.5  | 21.2  | 12.7  | 14.4  | 7.51  |
| <b>Met SO</b>      | 1.070 | 0.605  | 8.360 | 1.780 | 1.420 | 2.060 | 9.170 | 2.060 | 17.700 | 1.390 | 1.870 | 10.400 | 3.030 | 2.030 | 5.080 | 0.631 | 3.530 | 1.550 | 6.900 | 1.430 |
| <b>Putrescine</b>  | 0.089 | 0.100  | 0.781 | 0.152 | 0.285 | 0.015 | 0.708 | 0.015 | 0.015  | 0.148 | 0.289 | 0.519  | 0.146 | 0.109 | 1.360 | 0.015 | 0.146 | 0.128 | 0.175 | 0.335 |
| <b>SDMA</b>        | 1.880 | 0.541  | 2.330 | 1.070 | 0.150 | 1.470 | 1.550 | 0.996 | 2.490  | 1.890 | 1.270 | 3.620  | 1.170 | 1.560 | 3.570 | 0.708 | 1.920 | 3.220 | 1.590 | 0.652 |
| <b>Spermidine</b>  | 0.076 | 0.126  | 0.110 | 0.031 | 0.058 | 0.035 | 0.203 | 0.072 | 0.116  | 0.047 | 0.038 | 0.076  | 0.041 | 0.037 | 0.103 | 0.107 | 0.031 | 0.045 | 0.109 | 0.104 |
| <b>Spermine</b>    | 0.060 | 0.090  | 0.049 | 0.018 | 0.023 | 0.058 | 0.122 | 0.028 | 0.027  | 0.044 | 0.029 | 0.032  | 0.043 | 0.017 | 0.020 | 0.037 | 0.024 | 0.034 | 0.064 | 0.027 |
| <b>T4 OH Pro</b>   | 5.620 | 2.320  | 7.610 | 13.2  | 20.4  | 15.4  | 97.8  | 8.9   | 58.9   | 7.970 | 17.4  | 118    | 10.8  | 5.08  | 5.41  | 6.09  | 15.1  | 17.5  | 32    | 13    |
| <b>Taurine</b>     | 45.2  | 32.5   | 236   | 37.3  | 29.6  | 89.8  | 302   | 50.1  | 54.2   | 11.9  | 9.41  | 17.7   | 15.9  | 12.3  | 23.8  | 16.1  | 11.3  | 13.4  | 44    | 84.3  |
| <b>Total DMA</b>   | 2.340 | 0.579  | 2.790 | 1.380 | 0.788 | 1.610 | 2.000 | 1.080 | 4.080  | 2.480 | 1.500 | 5.660  | 1.260 | 1.720 | 3.290 | 0.902 | 2.930 | 3.180 | 2.600 | 1.050 |
| <b>SM OH C14:1</b> | 1.927 | 2.896  | 2.265 | 2.783 | 1.496 | 3.068 | 2.190 | 1.383 | 0.899  | 2.222 | 1.842 | 1.350  | 3.277 | 1.898 | 2.451 | 1.530 | 3.296 | 2.218 | 1.772 | 2.466 |
| <b>SM OH C16:1</b> | 0.879 | 0.958  | 0.833 | 0.990 | 0.674 | 1.138 | 0.736 | 0.709 | 0.415  | 0.744 | 0.521 | 0.414  | 1.207 | 0.611 | 1.026 | 0.536 | 0.893 | 0.722 | 0.482 | 1.002 |



|                    |        |        |        |        |        |        |        |        |        |        |        |        |        |        |        |        |        |        |        |        |
|--------------------|--------|--------|--------|--------|--------|--------|--------|--------|--------|--------|--------|--------|--------|--------|--------|--------|--------|--------|--------|--------|
| <b>SM OH C22:1</b> | 0.317  | 0.375  | 0.571  | 0.426  | 0.225  | 0.444  | 0.399  | 0.473  | 0.315  | 0.382  | 0.330  | 0.210  | 0.930  | 0.380  | 0.432  | 0.297  | 0.388  | 0.521  | 0.259  | 0.471  |
| <b>SM OH C22:2</b> | 0.323  | 0.289  | 0.494  | 0.452  | 0.217  | 0.454  | 0.434  | 0.421  | 0.313  | 0.445  | 0.384  | 0.232  | 0.938  | 0.283  | 0.638  | 0.309  | 0.391  | 0.626  | 0.248  | 0.506  |
| <b>SM OH C24:1</b> | 0.024  | 0.006  | 0.036  | 0.031  | 0.017  | 0.044  | 0.053  | 0.036  | 0.025  | 0.033  | 0.017  | 0.018  | 0.061  | 0.021  | 0.053  | 0.012  | 0.035  | 0.033  | 0.052  | 0.023  |
| <b>SM C16:0</b>    | 26.732 | 35.687 | 37.148 | 38.679 | 31.029 | 57.247 | 38.603 | 41.224 | 28.152 | 33.262 | 31.637 | 27.446 | 51.885 | 27.100 | 41.391 | 23.353 | 92.879 | 37.212 | 28.322 | 32.106 |
| <b>SM C16:1</b>    | 3.268  | 5.583  | 5.135  | 6.245  | 4.346  | 9.005  | 6.496  | 6.564  | 3.909  | 7.046  | 5.535  | 4.926  | 9.491  | 4.257  | 7.438  | 3.720  | 11.318 | 6.502  | 3.235  | 5.237  |
| <b>SM C18:0</b>    | 5.202  | 5.229  | 5.850  | 4.941  | 5.374  | 8.193  | 5.590  | 6.449  | 2.552  | 4.407  | 3.413  | 1.540  | 7.013  | 2.924  | 5.871  | 2.588  | 5.014  | 4.092  | 2.598  | 6.146  |
| <b>SM C18:1</b>    | 1.819  | 2.395  | 2.654  | 2.579  | 2.134  | 4.023  | 2.357  | 3.419  | 1.221  | 3.175  | 1.856  | 0.862  | 3.773  | 1.317  | 3.600  | 1.345  | 2.242  | 2.521  | 0.880  | 2.856  |
| <b>SM C20:2</b>    | 0.068  | 0.117  | 0.067  | 0.113  | 0.055  | 0.132  | 0.136  | 0.096  | 0.058  | 0.095  | 0.046  | 0.041  | 0.071  | 0.063  | 0.161  | 0.044  | 0.080  | 0.123  | 0.036  | 0.074  |
| <b>SM C22:3</b>    | 0.012  | 0.005  | 0.045  | 0.118  | 0.059  | 0.074  | 0.058  | 0.036  | 0.035  | 0.005  | 0.005  | 0.005  | 0.005  | 0.023  | 0.005  | 0.025  | 0.099  | 0.036  | 0.005  | 0.014  |
| <b>SM C24:0</b>    | 0.354  | 0.531  | 0.810  | 0.539  | 0.396  | 0.572  | 0.614  | 0.742  | 0.551  | 0.604  | 0.471  | 0.437  | 1.188  | 0.396  | 0.599  | 0.292  | 0.611  | 0.796  | 0.460  | 0.572  |
| <b>SM C24:1</b>    | 1.303  | 1.356  | 2.197  | 1.577  | 2.483  | 2.490  | 2.052  | 2.997  | 1.640  | 1.522  | 1.865  | 1.513  | 2.939  | 1.313  | 3.382  | 1.129  | 2.434  | 2.133  | 1.650  | 1.740  |
| <b>SM C26:1</b>    | 0.008  | 0.002  | 0.002  | 0.005  | 0.016  | 0.014  | 0.013  | 0.003  | 0.007  | 0.005  | 0.010  | 0.008  | 0.014  | 0.006  | 0.019  | 0.008  | 0.016  | 0.002  | 0.002  | 0.009  |
| <b>C0</b>          | 36.538 | 8.516  | 91.795 | 24.626 | 37.951 | 55.467 | 90.904 | 55.998 | 91.804 | 30.205 | 50.097 | 71.447 | 27.299 | 26.090 | 66.774 | 34.947 | 58.050 | 32.785 | 75.781 | 25.816 |
| <b>C2</b>          | 7.226  | 1.974  | 11.066 | 9.233  | 4.046  | 25.234 | 39.580 | 3.337  | 9.086  | 17.874 | 16.299 | 33.723 | 3.021  | 3.895  | 5.080  | 6.099  | 20.724 | 7.839  | 8.886  | 3.464  |
| <b>C4</b>          | 0.330  | 0.173  | 0.789  | 0.364  | 0.271  | 0.676  | 0.878  | 0.325  | 0.239  | 0.336  | 0.740  | 0.424  | 0.222  | 0.178  | 0.507  | 0.200  | 0.660  | 0.574  | 0.720  | 0.180  |

**Table S2** – Plasma concentration ( $\mu\text{M}$ ) of quantified metabolites for each patient at day 7 and survival rate at 28 and 90 days (S, survivor; NS, non survivor).

| Metabolite D7   | #1     | #2     | #3     | #4     | #5     | #6     | #7     | #8     | #9     | #10    | #11    | #12    | #13    | #14    | #15    | #16    | #17    | #18    | #19    | #20    |
|-----------------|--------|--------|--------|--------|--------|--------|--------|--------|--------|--------|--------|--------|--------|--------|--------|--------|--------|--------|--------|--------|
| 28 day survival | S      | S      | NS     | NS     | NS     | NS     | S      | S      | S      | S      | NS     | NS     | S      | S      | S      | NS     | NS     | S      | NS     | S      |
| 90 day survival | NS     | S      | NS     | NS     | NS     | NS     | S      | NS     | S      | S      | NS     | NS     | S      | S      | S      | NS     | NS     | S      | NS     | S      |
| LPC a C16:1     | 2.750  | 2.507  | 1.121  | 0.576  | 1.550  | 4.000  | 2.369  | 0.494  | 2.327  | 3.721  | 1.741  | 1.256  | 3.004  | 1.378  | 2.926  | 0.936  | 0.762  | 2.258  | 0.630  | 0.858  |
| LPC a C17:0     | 1.210  | 1.013  | 0.340  | 0.269  | 0.339  | 0.850  | 0.787  | 0.131  | 0.508  | 1.006  | 0.488  | 0.279  | 0.697  | 0.222  | 0.709  | 0.534  | 0.293  | 1.122  | 0.130  | 0.442  |
| LPC a C18:0     | 12.317 | 9.893  | 4.924  | 5.684  | 6.594  | 10.404 | 10.807 | 3.342  | 8.825  | 15.960 | 7.721  | 3.080  | 14.744 | 2.346  | 11.795 | 6.908  | 3.642  | 17.854 | 1.409  | 5.309  |
| LPC a C18:1     | 17.099 | 20.421 | 10.772 | 7.772  | 12.801 | 30.973 | 13.072 | 5.807  | 16.064 | 27.513 | 12.215 | 7.810  | 10.495 | 3.109  | 14.485 | 15.905 | 4.872  | 19.699 | 5.000  | 5.600  |
| LPC a C18:2     | 10.566 | 19.960 | 8.192  | 6.823  | 7.092  | 22.995 | 8.158  | 5.064  | 17.805 | 15.080 | 3.789  | 5.868  | 5.436  | 1.683  | 7.052  | 21.953 | 3.256  | 11.406 | 5.355  | 5.641  |
| LPC a C20:3     | 1.493  | 1.338  | 0.872  | 0.406  | 1.316  | 3.745  | 1.235  | 0.267  | 0.746  | 2.113  | 0.955  | 0.367  | 0.999  | 0.382  | 1.008  | 0.989  | 0.490  | 1.424  | 0.612  | 0.486  |
| LPC a C20:4     | 3.671  | 2.916  | 1.606  | 0.978  | 2.973  | 5.801  | 2.011  | 0.667  | 2.068  | 4.438  | 1.240  | 0.967  | 2.873  | 0.898  | 2.059  | 2.404  | 0.807  | 3.307  | 0.585  | 1.515  |
| LPC a C24:0     | 0.093  | 0.104  | 0.080  | 0.085  | 0.066  | 0.096  | 0.142  | 0.075  | 0.102  | 0.093  | 0.060  | 0.086  | 0.096  | 0.064  | 0.109  | 0.062  | 0.066  | 0.120  | 0.041  | 0.084  |
| LPC a C28:1     | 0.143  | 0.141  | 0.080  | 0.123  | 0.076  | 0.110  | 0.135  | 0.085  | 0.063  | 0.122  | 0.090  | 0.160  | 0.203  | 0.149  | 0.139  | 0.070  | 0.116  | 0.110  | 0.072  | 0.138  |
| PC aa C28:1     | 1.907  | 2.100  | 1.487  | 1.955  | 0.847  | 1.709  | 1.579  | 1.118  | 1.183  | 2.330  | 1.567  | 2.736  | 2.781  | 1.852  | 1.746  | 1.435  | 2.332  | 1.635  | 0.748  | 1.794  |
| PC aa C30:0     | 3.132  | 4.081  | 2.850  | 4.462  | 1.871  | 3.080  | 4.676  | 2.781  | 3.208  | 3.987  | 3.277  | 7.661  | 5.166  | 4.296  | 3.135  | 1.493  | 4.093  | 2.901  | 2.959  | 4.051  |
| PC aa C30:2     | 0.005  | 0.005  | 0.037  | 0.100  | 0.005  | 0.059  | 0.070  | 0.060  | 0.074  | 0.005  | 0.274  | 0.356  | 0.005  | 0.215  | 0.247  | 0.047  | 0.122  | 0.005  | 0.083  | 0.119  |
| PC aa C32:0     | 168.78 | 187.16 | 142.05 | 331.74 | 96.986 | 168.03 | 268.98 | 207.7  | 164.15 | 173.83 | 188.01 | 451.81 | 201.3  | 134.24 | 154.36 | 132.2  | 404.2  | 170.8  | 188.16 | 206.51 |
| PC aa C32:1     | 249.77 | 266.14 | 194.71 | 287.7  | 144.29 | 416.55 | 395.58 | 174.32 | 162.21 | 268.43 | 343.82 | 435.23 | 382.44 | 572.41 | 389.91 | 101.31 | 774.17 | 159.55 | 290.92 | 230.62 |
| PC aa C32:2     | 23.973 | 49.502 | 11.919 | 24.009 | 12.084 | 42.205 | 43.367 | 17.235 | 15.876 | 22.052 | 17.212 | 28.395 | 40.072 | 53.781 | 25.310 | 16.069 | 39.420 | 30.674 | 13.696 | 36.692 |
| PC aa C32:3     | 2.694  | 4.149  | 1.432  | 2.603  | 2.206  | 3.896  | 4.271  | 1.442  | 1.310  | 3.482  | 1.932  | 1.965  | 5.785  | 5.123  | 3.486  | 2.447  | 2.019  | 3.830  | 1.049  | 2.992  |
| PC aa C34:1     | 2036   | 2314.4 | 1562.4 | 3559.7 | 1233.6 | 2870.3 | 2695.1 | 2038.2 | 865.9  | 2356.5 | 2990.5 | 1478.8 | 2322.9 | 1353.2 | 2319.5 | 2022.3 | 3740.3 | 1923.7 | 1160.9 | 2088.5 |
| PC aa C34:2     | 2141.4 | 3034.9 | 1229.9 | 4325.2 | 781.9  | 2300.1 | 2686.5 | 2668.1 | 1327.7 | 1823.5 | 1877.5 | 1350.2 | 1899.2 | 1187.6 | 1077   | 3458.1 | 3832.7 | 2564.1 | 1227.1 | 3205.1 |
| PC aa C34:3     | 77.561 | 172.34 | 40.878 | 130.95 | 51.929 | 129.92 | 141.35 | 55.915 | 43.644 | 107.79 | 69.660 | 56.852 | 152.12 | 143.65 | 108.58 | 93.371 | 135.10 | 115.73 | 54.052 | 127.87 |
| PC aa C34:4     | 6.528  | 12.192 | 2.446  | 5.464  | 4.618  | 11.793 | 9.174  | 2.801  | 2.849  | 7.929  | 3.804  | 4.150  | 14.307 | 12.474 | 8.734  | 3.944  | 6.489  | 8.492  | 2.341  | 8.604  |
| PC aa C36:0     | 5.274  | 7.325  | 3.387  | 6.533  | 1.593  | 7.179  | 8.500  | 5.568  | 6.927  | 4.892  | 1.481  | 7.186  | 6.045  | 3.309  | 2.284  | 5.637  | 9.316  | 5.215  | 2.033  | 7.056  |
| PC aa C36:1     | 148.52 | 167.98 | 182.47 | 478.68 | 154.35 | 347.03 | 268.44 | 224.96 | 89.821 | 230.5  | 248.23 | 169.76 | 342.52 | 134.22 | 468.42 | 196.72 | 268.91 | 193.79 | 91.290 | 231.59 |
| PC aa C36:2     | 598.4  | 910.25 | 636.61 | 1763.2 | 340.08 | 837.16 | 845.83 | 899.11 | 525.52 | 761.24 | 664.54 | 674.84 | 661.02 | 334.49 | 643.28 | 973.42 | 1089.6 | 949.81 | 426.31 | 990.12 |
| PC aa C36:3     | 496.14 | 781.71 | 287.62 | 513.29 | 277.40 | 508.53 | 512.38 | 260.44 | 289.29 | 563.62 | 548.31 | 383.83 | 501.06 | 304.02 | 373.16 | 433.00 | 602.14 | 663.95 | 407.22 | 380.54 |
| PC aa C36:4     | 615.67 | 792.36 | 268.09 | 426.30 | 369.82 | 642.19 | 508.83 | 244.08 | 200.10 | 694.66 | 400.26 | 364.54 | 994.50 | 480.46 | 510.86 | 368.73 | 574.95 | 660.61 | 196.54 | 724.87 |
| PC aa C36:5     | 52.972 | 84.406 | 25.797 | 28.331 | 32.121 | 135.12 | 52.253 | 18.540 | 23.250 | 117.47 | 21.721 | 36.503 | 105.54 | 77.650 | 113.74 | 48.427 | 39.509 | 66.158 | 19.275 | 48.539 |

|             |        |        |        |        |        |        |        |        |        |        |        |        |        |        |        |        |        |        |        |        |
|-------------|--------|--------|--------|--------|--------|--------|--------|--------|--------|--------|--------|--------|--------|--------|--------|--------|--------|--------|--------|--------|
| PC aa C36:6 | 2.366  | 4.228  | 1.283  | 2.445  | 1.059  | 4.844  | 3.110  | 1.443  | 1.233  | 3.719  | 1.467  | 2.211  | 3.881  | 2.639  | 3.473  | 1.796  | 2.077  | 3.006  | 1.068  | 2.301  |
| PC aa C38:0 | 5.829  | 3.538  | 2.781  | 5.435  | 1.896  | 7.118  | 9.661  | 4.170  | 4.567  | 4.847  | 3.715  | 10.055 | 4.631  | 3.387  | 6.338  | 4.617  | 10.230 | 7.088  | 2.121  | 4.277  |
| PC aa C38:1 | 0.990  | 2.180  | 1.734  | 0.374  | 0.504  | 1.989  | 2.531  | 1.762  | 2.211  | 2.446  | 0.069  | 0.388  | 1.021  | 0.658  | 0.843  | 1.365  | 1.133  | 3.499  | 0.156  | 0.000  |
| PC aa C38:3 | 90.577 | 104.07 | 59.051 | 87.135 | 84.848 | 115.97 | 109.53 | 38.895 | 47.935 | 111.18 | 101.82 | 71.647 | 151.6  | 71.059 | 127.39 | 46.071 | 82.570 | 115.50 | 50.772 | 74.177 |
| PC aa C38:4 | 198.27 | 188.16 | 114.50 | 239.94 | 168.95 | 230.44 | 182.81 | 108.59 | 79.353 | 236.87 | 130.6  | 132.15 | 435.24 | 132.73 | 275.75 | 128.19 | 207.47 | 236.56 | 59.148 | 252.15 |
| PC aa C38:5 | 116.96 | 118.82 | 44.280 | 76.642 | 64.701 | 143.42 | 84.406 | 36.125 | 38.712 | 137.42 | 48.996 | 46.907 | 185.41 | 53.837 | 132.48 | 54.638 | 104.12 | 132.02 | 27.424 | 90.264 |
| PC aa C38:6 | 155.16 | 102.69 | 43.300 | 105.39 | 46.501 | 138.73 | 153.13 | 57.988 | 43.902 | 151.82 | 55.175 | 32.700 | 125.8  | 44.638 | 136.40 | 109.61 | 145.03 | 170.24 | 21.440 | 112.62 |
| PC aa C40:1 | 0.675  | 0.601  | 0.543  | 0.783  | 0.474  | 0.536  | 0.935  | 0.676  | 0.726  | 0.669  | 0.563  | 0.752  | 0.671  | 0.722  | 0.681  | 0.422  | 0.834  | 0.664  | 0.486  | 0.780  |
| PC aa C40:2 | 0.544  | 0.900  | 0.689  | 0.779  | 0.703  | 0.607  | 1.112  | 0.648  | 0.749  | 0.761  | 0.688  | 1.086  | 0.764  | 0.549  | 0.502  | 0.555  | 0.896  | 0.862  | 0.604  | 0.568  |
| PC aa C40:3 | 0.698  | 0.839  | 0.846  | 1.353  | 0.573  | 0.719  | 1.461  | 0.599  | 0.714  | 0.874  | 0.830  | 1.360  | 1.290  | 0.568  | 0.601  | 0.746  | 1.765  | 1.224  | 0.809  | 0.897  |
| PC aa C40:4 | 4.987  | 4.058  | 2.774  | 5.669  | 3.484  | 5.305  | 4.817  | 2.928  | 3.207  | 3.570  | 3.458  | 4.029  | 8.076  | 2.580  | 4.932  | 2.473  | 8.854  | 5.846  | 2.183  | 5.720  |
| PC aa C40:5 | 12.230 | 8.047  | 5.240  | 13.712 | 6.644  | 14.921 | 10.595 | 5.515  | 5.005  | 11.011 | 4.466  | 6.140  | 18.502 | 5.225  | 13.741 | 6.375  | 15.472 | 14.081 | 3.757  | 13.377 |
| PC aa C40:6 | 30.574 | 17.710 | 13.348 | 32.010 | 15.010 | 33.292 | 37.375 | 12.873 | 10.530 | 34.100 | 12.467 | 9.643  | 35.919 | 10.088 | 57.616 | 21.901 | 32.447 | 40.677 | 5.819  | 26.914 |
| PC aa C42:0 | 0.414  | 0.431  | 0.226  | 0.564  | 0.156  | 0.645  | 0.778  | 0.232  | 0.439  | 0.450  | 0.260  | 0.574  | 0.493  | 0.445  | 0.449  | 0.415  | 0.552  | 0.787  | 0.246  | 0.447  |
| PC aa C42:1 | 0.344  | 0.269  | 0.189  | 0.266  | 0.245  | 0.250  | 0.342  | 0.151  | 0.219  | 0.141  | 0.107  | 0.279  | 0.468  | 0.340  | 0.345  | 0.239  | 0.422  | 0.408  | 0.198  | 0.419  |
| PC aa C42:2 | 0.194  | 0.222  | 0.177  | 0.238  | 0.123  | 0.213  | 0.286  | 0.302  | 0.323  | 0.153  | 0.215  | 0.371  | 0.278  | 0.148  | 0.205  | 0.291  | 0.227  | 0.267  | 0.185  | 0.207  |
| PC aa C42:4 | 0.107  | 0.187  | 0.237  | 0.369  | 0.082  | 0.413  | 0.192  | 0.109  | 0.214  | 0.149  | 0.189  | 0.331  | 0.343  | 0.115  | 0.282  | 0.226  | 0.312  | 0.204  | 0.112  | 0.254  |
| PC aa C42:5 | 0.314  | 0.336  | 0.233  | 0.316  | 0.238  | 0.186  | 0.250  | 0.301  | 0.175  | 0.305  | 0.183  | 0.500  | 0.413  | 0.174  | 0.312  | 0.304  | 0.570  | 0.316  | 0.245  | 0.451  |
| PC aa C42:6 | 0.536  | 0.382  | 0.334  | 0.702  | 0.297  | 0.479  | 0.518  | 0.249  | 0.518  | 0.421  | 0.476  | 0.658  | 0.617  | 0.344  | 0.447  | 0.388  | 0.721  | 0.365  | 0.265  | 0.292  |
| PC ae C30:0 | 0.283  | 0.301  | 0.251  | 0.475  | 0.130  | 0.254  | 0.417  | 0.173  | 0.251  | 0.374  | 0.276  | 0.907  | 0.288  | 0.366  | 0.220  | 0.147  | 0.312  | 0.293  | 0.214  | 0.323  |
| PC ae C30:1 | 0.046  | 0.129  | 0.122  | 0.090  | 0.016  | 0.117  | 0.179  | 0.048  | 0.167  | 0.077  | 0.094  | 0.277  | 0.128  | 0.124  | 0.164  | 0.068  | 0.069  | 0.107  | 0.118  | 0.051  |
| PC ae C30:2 | 0.064  | 0.069  | 0.044  | 0.070  | 0.032  | 0.077  | 0.077  | 0.045  | 0.035  | 0.073  | 0.050  | 0.088  | 0.077  | 0.054  | 0.071  | 0.053  | 0.082  | 0.064  | 0.026  | 0.058  |
| PC ae C32:1 | 27.758 | 31.071 | 22.107 | 40.812 | 10.006 | 46.048 | 69.749 | 25.331 | 35.333 | 29.846 | 31.845 | 78.824 | 26.744 | 39.233 | 27.023 | 19.280 | 34.558 | 34.076 | 18.693 | 32.126 |
| PC ae C32:2 | 6.148  | 7.687  | 5.637  | 5.919  | 2.707  | 10.543 | 10.880 | 4.654  | 7.867  | 6.342  | 5.572  | 14.615 | 8.596  | 7.878  | 6.659  | 3.877  | 5.099  | 7.789  | 3.720  | 4.859  |
| PC ae C34:0 | 11.635 | 11.113 | 9.573  | 15.966 | 3.332  | 8.397  | 14.838 | 6.276  | 6.081  | 10.346 | 7.687  | 19.726 | 9.245  | 7.126  | 6.883  | 6.308  | 12.721 | 7.204  | 8.096  | 8.494  |
| PC ae C34:1 | 102.18 | 94.683 | 66.171 | 144.63 | 47.508 | 128.69 | 150.75 | 91.301 | 58.008 | 99.144 | 108.74 | 161.01 | 91.964 | 98.187 | 99.800 | 66.571 | 151.39 | 91.570 | 75.032 | 77.242 |
| PC ae C34:2 | 51.199 | 67.791 | 37.244 | 92.822 | 24.817 | 81.084 | 113.9  | 55.247 | 45.272 | 44.946 | 45.619 | 64.065 | 66.512 | 56.235 | 43.325 | 59.188 | 52.748 | 78.248 | 30.923 | 71.862 |
| PC ae C34:3 | 20.539 | 28.189 | 15.776 | 19.233 | 12.902 | 34.449 | 42.278 | 20.304 | 26.979 | 16.739 | 18.108 | 29.641 | 43.992 | 27.981 | 17.480 | 18.013 | 16.625 | 32.086 | 10.666 | 20.068 |
| PC ae C36:0 | 5.861  | 2.832  | 11.438 | 6.669  | 1.231  | 4.604  | 7.701  | 5.700  | 4.183  | 4.902  | 5.125  | 7.998  | 5.023  | 2.851  | 5.145  | 3.195  | 7.829  | 4.895  | 3.038  | 3.227  |
| PC ae C36:1 | 39.346 | 46.451 | 37.504 | 50.540 | 18.046 | 51.228 | 53.240 | 35.814 | 21.423 | 37.752 | 32.784 | 36.172 | 36.215 | 25.897 | 47.728 | 30.269 | 41.492 | 34.413 | 19.077 | 35.152 |
| PC ae C36:2 | 56.369 | 72.835 | 36.010 | 99.458 | 21.442 | 65.848 | 70.978 | 48.006 | 30.824 | 46.104 | 42.593 | 48.540 | 43.900 | 33.955 | 40.995 | 62.851 | 57.628 | 61.528 | 28.111 | 69.204 |
| PC ae C36:3 | 28.730 | 32.186 | 17.286 | 42.817 | 14.228 | 40.225 | 59.529 | 34.816 | 21.126 | 27.248 | 30.503 | 27.852 | 31.531 | 30.411 | 25.208 | 31.540 | 32.656 | 43.501 | 18.177 | 26.169 |

|             |        |        |        |        |        |        |        |        |        |        |        |        |        |        |        |        |        |        |        |        |
|-------------|--------|--------|--------|--------|--------|--------|--------|--------|--------|--------|--------|--------|--------|--------|--------|--------|--------|--------|--------|--------|
| PC ae C36:4 | 59.126 | 50.398 | 31.416 | 57.318 | 26.812 | 79.505 | 90.168 | 32.668 | 49.851 | 54.051 | 59.660 | 98.348 | 73.540 | 56.323 | 39.445 | 42.869 | 122.66 | 69.836 | 22.559 | 62.643 |
| PC ae C36:5 | 40.009 | 38.045 | 24.566 | 20.751 | 17.208 | 65.108 | 46.751 | 19.331 | 46.209 | 28.810 | 23.337 | 53.097 | 46.500 | 40.898 | 25.442 | 24.236 | 50.443 | 52.237 | 13.609 | 38.827 |
| PC ae C38:0 | 3.367  | 3.935  | 1.678  | 2.502  | 1.453  | 5.208  | 3.935  | 1.844  | 1.854  | 4.525  | 1.545  | 2.226  | 5.007  | 1.949  | 4.497  | 2.537  | 3.570  | 4.221  | 1.070  | 2.948  |
| PC ae C38:1 | 1.364  | 1.778  | 3.907  | 3.183  | 1.487  | 2.947  | 3.543  | 5.329  | 2.542  | 1.263  | 1.734  | 3.153  | 1.754  | 1.573  | 2.049  | 1.553  | 2.663  | 2.610  | 1.117  | 0.911  |
| PC ae C38:2 | 4.806  | 5.093  | 5.427  | 10.588 | 4.486  | 4.040  | 9.471  | 6.381  | 5.141  | 5.730  | 4.401  | 6.864  | 4.485  | 3.719  | 4.668  | 4.813  | 6.023  | 5.303  | 3.588  | 4.539  |
| PC ae C38:3 | 11.448 | 12.501 | 10.770 | 11.813 | 9.606  | 12.678 | 19.965 | 9.020  | 9.312  | 12.499 | 10.032 | 9.492  | 11.620 | 10.706 | 11.580 | 8.094  | 8.552  | 13.361 | 5.636  | 8.251  |
| PC ae C38:4 | 35.248 | 28.867 | 16.737 | 34.930 | 17.102 | 38.700 | 47.214 | 18.186 | 21.616 | 32.925 | 29.200 | 40.174 | 41.221 | 27.383 | 27.288 | 20.256 | 42.606 | 38.538 | 12.449 | 40.442 |
| PC ae C38:5 | 59.291 | 41.913 | 27.454 | 47.061 | 30.036 | 70.104 | 74.883 | 33.758 | 53.642 | 46.380 | 47.890 | 99.991 | 52.357 | 41.273 | 43.650 | 41.137 | 97.221 | 67.743 | 23.467 | 42.471 |
| PC ae C38:6 | 15.864 | 12.001 | 8.180  | 13.188 | 6.314  | 26.676 | 24.308 | 8.783  | 14.374 | 13.990 | 9.198  | 20.521 | 16.248 | 12.503 | 15.169 | 11.101 | 22.423 | 20.199 | 4.858  | 11.970 |
| PC ae C40:1 | 1.337  | 1.836  | 0.643  | 0.836  | 0.844  | 1.559  | 1.695  | 1.101  | 1.404  | 1.669  | 0.812  | 1.210  | 1.795  | 0.660  | 1.710  | 1.031  | 1.288  | 1.633  | 0.585  | 1.166  |
| PC ae C40:2 | 2.237  | 2.253  | 2.052  | 2.984  | 1.818  | 2.275  | 2.691  | 1.694  | 2.096  | 1.907  | 2.068  | 1.967  | 2.041  | 1.565  | 2.358  | 2.591  | 1.904  | 2.306  | 1.136  | 2.323  |
| PC ae C40:3 | 1.884  | 1.631  | 3.211  | 1.901  | 2.566  | 2.315  | 4.784  | 3.206  | 2.746  | 2.026  | 1.925  | 1.820  | 2.355  | 2.119  | 2.259  | 1.170  | 1.898  | 2.524  | 1.160  | 2.023  |
| PC ae C40:4 | 3.925  | 2.868  | 3.024  | 4.519  | 3.143  | 4.220  | 6.654  | 3.392  | 4.277  | 3.294  | 3.066  | 4.029  | 5.585  | 2.565  | 3.245  | 3.145  | 3.425  | 4.337  | 1.824  | 3.887  |
| PC ae C40:5 | 6.674  | 4.457  | 4.444  | 6.877  | 4.109  | 8.650  | 11.727 | 6.461  | 6.929  | 6.300  | 5.472  | 11.282 | 8.114  | 4.467  | 6.447  | 4.328  | 9.410  | 10.243 | 2.422  | 6.705  |
| PC ae C40:6 | 7.866  | 4.652  | 2.991  | 7.274  | 3.208  | 10.451 | 11.139 | 4.125  | 5.867  | 6.673  | 4.232  | 9.809  | 7.829  | 5.161  | 8.243  | 6.216  | 11.143 | 9.723  | 2.221  | 7.228  |
| PC ae C42:0 | 0.910  | 0.779  | 0.809  | 0.893  | 0.697  | 0.953  | 1.084  | 0.685  | 0.619  | 0.895  | 0.652  | 0.967  | 0.853  | 0.585  | 0.782  | 0.669  | 1.191  | 1.154  | 0.750  | 0.731  |
| PC ae C42:1 | 0.542  | 0.681  | 0.643  | 0.594  | 0.503  | 0.845  | 0.560  | 0.662  | 0.534  | 0.547  | 0.402  | 0.652  | 0.790  | 0.479  | 0.571  | 0.439  | 0.975  | 0.711  | 0.359  | 0.843  |
| PC ae C42:2 | 0.450  | 0.408  | 0.275  | 0.277  | 0.233  | 0.352  | 0.827  | 0.390  | 0.276  | 0.495  | 0.340  | 0.611  | 0.458  | 0.300  | 0.523  | 0.320  | 0.501  | 0.393  | 0.226  | 0.485  |
| PC ae C42:3 | 0.841  | 0.834  | 0.434  | 0.541  | 0.454  | 0.925  | 1.366  | 0.640  | 0.713  | 0.923  | 0.648  | 0.660  | 0.772  | 0.373  | 0.852  | 0.681  | 0.700  | 0.886  | 0.336  | 0.602  |
| PC ae C42:4 | 0.826  | 0.408  | 0.498  | 0.650  | 0.455  | 0.913  | 1.439  | 0.773  | 1.127  | 0.594  | 0.600  | 0.669  | 0.749  | 0.656  | 0.914  | 0.661  | 0.608  | 0.828  | 0.241  | 0.788  |
| PC ae C42:5 | 2.164  | 1.735  | 1.256  | 1.663  | 1.050  | 2.752  | 3.865  | 1.644  | 2.764  | 1.951  | 2.138  | 3.318  | 2.108  | 1.831  | 2.666  | 1.542  | 1.731  | 3.711  | 0.933  | 1.900  |
| PC ae C44:3 | 0.171  | 0.133  | 0.054  | 0.202  | 0.141  | 0.180  | 0.152  | 0.131  | 0.126  | 0.120  | 0.117  | 0.141  | 0.157  | 0.108  | 0.060  | 0.158  | 0.166  | 0.174  | 0.122  | 0.076  |
| PC ae C44:4 | 0.164  | 0.237  | 0.143  | 0.249  | 0.164  | 0.327  | 0.274  | 0.197  | 0.193  | 0.297  | 0.324  | 0.204  | 0.219  | 0.216  | 0.257  | 0.225  | 0.206  | 0.238  | 0.168  | 0.155  |
| PC ae C44:5 | 0.974  | 0.574  | 0.411  | 0.411  | 0.277  | 1.733  | 1.444  | 0.537  | 1.160  | 0.701  | 0.704  | 1.523  | 0.782  | 0.598  | 0.707  | 0.815  | 0.694  | 0.858  | 0.436  | 0.720  |
| PC ae C44:6 | 0.636  | 0.626  | 0.236  | 0.433  | 0.346  | 1.220  | 1.042  | 0.393  | 0.947  | 0.689  | 0.519  | 1.288  | 0.785  | 0.766  | 0.923  | 0.452  | 0.804  | 0.883  | 0.401  | 0.884  |
| Sugars      | 8079.7 | 7240.2 | 4793.8 | 4408.4 | 7463.5 | 7087.4 | 8615.3 | 16726  | 5410.5 | 8425.9 | 8411.7 | 9153.4 | 7390.9 | 10431  | 7747.9 | 7737.1 | 6909   | 7399.8 | 11244  | 13247  |
| Ala         | 228    | 230    | 360    | 484    | 139    | 484    | 527    | 696    | 573    | 325    | 272    | 1980   | 301    | 339    | 383    | 141    | 282    | 129    | 693    | 288    |
| Arg         | 123    | 67.6   | 96.8   | 101    | 143    | 150    | 122    | 241    | 238    | 115    | 131    | 365    | 165    | 230    | 191    | 76.8   | 143    | 90.4   | 129    | 58.4   |
| Asn         | 64.4   | 78     | 36.3   | 91.7   | 18.4   | 66.4   | 98.4   | 80.4   | 109    | 93.6   | 35.7   | 404    | 71.8   | 57.8   | 33.6   | 47     | 87.1   | 40.5   | 138    | 54     |
| Asp         | 4.7    | 14.7   | 37.6   | 21.9   | 37     | 5.720  | 21.7   | 16.3   | 10.2   | 7.340  | 8.660  | 16.6   | 13     | 9.410  | 2.760  | 7.050  | 15.8   | 4.490  | 25.7   | 22.1   |
| Cit         | 28.4   | 13.8   | 22.9   | 24     | 9.210  | 15.5   | 19     | 35     | 15.9   | 19.2   | 24.1   | 215    | 31.4   | 17.4   | 9.950  | 13     | 19.6   | 30.6   | 40.9   | 14.7   |
| Gln         | 842    | 629    | 38.1   | 835    | 24.2   | 941    | 589    | 72.8   | 423    | 863    | 490    | 3120   | 516    | 492    | 742    | 650    | 787    | 517    | 1160   | 637    |

|                    |        |        |        |        |        |        |        |        |        |        |        |        |        |        |        |        |        |       |        |        |
|--------------------|--------|--------|--------|--------|--------|--------|--------|--------|--------|--------|--------|--------|--------|--------|--------|--------|--------|-------|--------|--------|
| <b>Glu</b>         | 45.8   | 107    | 477    | 65.1   | 310    | 46.5   | 272    | 594    | 307    | 67.3   | 152    | 67.8   | 349    | 268    | 55.2   | 57     | 262    | 98.6  | 97.1   | 85.9   |
| <b>Gly</b>         | 237    | 287    | 253    | 303    | 183    | 385    | 380    | 520    | 327    | 274    | 341    | 1830   | 202    | 473    | 525    | 157    | 297    | 187   | 344    | 216    |
| <b>His</b>         | 73.2   | 62     | 118    | 154    | 62.8   | 118    | 126    | 109    | 122    | 96     | 75.2   | 235    | 124    | 115    | 108    | 53.8   | 109    | 60.5  | 169    | 72.5   |
| <b>Ile</b>         | 102    | 52.8   | 55.1   | 94.3   | 98.3   | 76     | 80.1   | 88.5   | 130    | 76.2   | 73.1   | 202    | 107    | 87     | 111    | 62.7   | 52.4   | 49.1  | 137    | 64.8   |
| <b>Leu</b>         | 221    | 116    | 108    | 144    | 123    | 147    | 170    | 178    | 226    | 173    | 107    | 358    | 222    | 163    | 160    | 123    | 113    | 114   | 287    | 139    |
| <b>Lys</b>         | 365    | 328    | 287    | 344    | 318    | 430    | 486    | 608    | 714    | 380    | 252    | 1440   | 595    | 703    | 425    | 273    | 317    | 333   | 511    | 370    |
| <b>Met</b>         | 33.7   | 36.7   | 38.4   | 1110   | 60.5   | 56.7   | 70.2   | 857    | 760    | 35.8   | 35.1   | 577    | 39.8   | 62.2   | 62.8   | 24.5   | 38     | 19.9  | 88.9   | 35.3   |
| <b>Orn</b>         | 176    | 111    | 62.8   | 121    | 98.8   | 97.6   | 202    | 177    | 231    | 92.1   | 141    | 486    | 141    | 149    | 237    | 103    | 74     | 112   | 164    | 181    |
| <b>Phe</b>         | 145    | 111    | 196    | 130    | 178    | 184    | 218    | 240    | 122    | 174    | 176    | 392    | 128    | 158    | 193    | 166    | 145    | 114   | 303    | 197    |
| <b>Pro</b>         | 219    | 308    | 174    | 346    | 47.9   | 246    | 247    | 403    | 321    | 201    | 181    | 1310   | 336    | 268    | 316    | 139    | 325    | 235   | 371    | 147    |
| <b>Ser</b>         | 81.7   | 110    | 90.1   | 96.6   | 48.2   | 112    | 172    | 233    | 110    | 104    | 110    | 408    | 147    | 164    | 155    | 81.1   | 97.9   | 54.4  | 112    | 109    |
| <b>Thr</b>         | 84.4   | 131    | 137    | 212    | 167    | 135    | 152    | 230    | 213    | 201    | 113    | 739    | 228    | 343    | 118    | 139    | 125    | 105   | 195    | 140    |
| <b>Trp</b>         | 51.7   | 52.9   | 54.7   | 59.6   | 78.4   | 63.4   | 130    | 1      | 120    | 86.1   | 67.1   | 139    | 84     | 70.5   | 94.9   | 29.3   | 50.5   | 53.7  | 101    | 82.1   |
| <b>Tyr</b>         | 83.9   | 78.5   | 127    | 111    | 55.8   | 88     | 187    | 170    | 294    | 117    | 65.6   | 541    | 115    | 114    | 92.6   | 72.6   | 157    | 84.8  | 289    | 121    |
| <b>Val</b>         | 376    | 297    | 210    | 392    | 423    | 249    | 311    | 328    | 567    | 353    | 263    | 638    | 481    | 336    | 383    | 285    | 260    | 273   | 689    | 297    |
| <b>Ac Orn</b>      | 1.690  | 0.392  | 0.082  | 0.194  | 0.075  | 0.157  | 0.780  | 0.273  | 0.042  | 0.174  | 0.278  | 1.380  | 0.359  | 0.241  | 0.425  | 0.285  | 0.476  | 0.712 | 0.829  | 0.161  |
| <b>ADMA</b>        | 0.710  | 0.722  | 0.863  | 1.020  | 0.520  | 0.858  | 0.954  | 0.622  | 1.420  | 0.661  | 1.090  | 3.020  | 0.984  | 1.000  | 0.758  | 0.581  | 1.630  | 1.050 | 1.680  | 0.762  |
| <b>Alpha AAA</b>   | 1.460  | 2.300  | 1.410  | 5.400  | 2.090  | 1.230  | 2.380  | 1.810  | 2.830  | 1.260  | 1.130  | 6.490  | 3.160  | 2.600  | 1.170  | 1.740  | 0.150  | 2.300 | 0.989  | 2.840  |
| <b>Creatinine</b>  | 178    | 43.7   | 295    | 156    | 48.7   | 64.8   | 74.9   | 72.7   | 56.3   | 143    | 137    | 185    | 517    | 72.3   | 109    | 145    | 583    | 175   | 188    | 120    |
| <b>DOPA</b>        | 0.155  | 0.205  | 0.174  | 0.212  | 0.140  | 0.236  | 0.438  | 0.434  | 0.399  | 0.203  | 0.176  | 0.583  | 0.201  | 0.230  | 0.231  | 0.132  | 0.040  | 0.092 | 0.356  | 0.223  |
| <b>Kynurenine</b>  | 6.580  | 2.280  | 12.000 | 33.400 | 9.280  | 7.140  | 5.580  | 7.680  | 3.820  | 9.470  | 6.660  | 20.600 | 8.210  | 12.300 | 8.910  | 11.600 | 45.000 | 8.160 | 16.800 | 4.760  |
| <b>Met:SO</b>      | 0.972  | 2.420  | 5.530  | 17.500 | 2.580  | 2.040  | 2.950  | 50.200 | 20.900 | 2.460  | 2.410  | 15.100 | 5.300  | 8.200  | 3.570  | 1.970  | 3.430  | 1.690 | 5.680  | 0.833  |
| <b>Putrescine</b>  | 0.270  | 0.273  | 2.350  | 0.180  | 0.271  | 0.459  | 0.528  | 0.245  | 0.345  | 0.278  | 0.290  | 1.440  | 1.010  | 0.345  | 0.272  | 0.331  | 0.284  | 0.233 | 0.701  | 0.245  |
| <b>SDMA</b>        | 1.220  | 0.150  | 3.650  | 1.150  | 0.150  | 1.150  | 0.774  | 0.901  | 1.320  | 1.440  | 1.780  | 2.540  | 3.300  | 1.710  | 1.680  | 1.370  | 3.340  | 3.870 | 2.190  | 1.110  |
| <b>Spermidine</b>  | 0.124  | 0.311  | 0.156  | 0.093  | 0.058  | 0.060  | 0.437  | 0.132  | 0.060  | 0.249  | 0.108  | 0.199  | 0.161  | 0.065  | 0.044  | 0.049  | 0.089  | 0.041 | 0.103  | 0.201  |
| <b>Spermine</b>    | 0.041  | 0.454  | 0.051  | 0.079  | 0.024  | 0.034  | 0.218  | 0.030  | 0.010  | 0.108  | 0.034  | 0.048  | 0.028  | 0.041  | 0.019  | 0.020  | 0.077  | 0.029 | 0.061  | 0.104  |
| <b>T4 OH Pro</b>   | 8.040  | 6.550  | 9.250  | 36.000 | 10.200 | 6.690  | 9.760  | 11.600 | 18.800 | 13.400 | 5.650  | 161.00 | 6.850  | 12.700 | 7.360  | 5.230  | 11.800 | 5.190 | 24.600 | 4.360  |
| <b>Taurine</b>     | 61.600 | 47.500 | 48.100 | 19.800 | 27.700 | 34.400 | 136.00 | 12.100 | 21.900 | 40.500 | 11.800 | 24.100 | 19.100 | 12.400 | 35.100 | 11.900 | 31.200 | 9.370 | 41.200 | 59.200 |
| <b>Total DMA</b>   | 2.050  | 0.585  | 3.680  | 1.870  | 0.731  | 1.530  | 1.300  | 1.220  | 2.050  | 2.050  | 2.270  | 5.120  | 4.200  | 2.720  | 1.960  | 1.820  | 4.300  | 4.420 | 3.790  | 1.780  |
| <b>SM OH C14:1</b> | 3.052  | 3.027  | 1.895  | 3.372  | 1.232  | 2.229  | 2.219  | 1.520  | 1.262  | 2.860  | 2.290  | 3.114  | 3.159  | 2.455  | 2.112  | 2.186  | 2.986  | 2.252 | 1.257  | 2.093  |
| <b>SM OH C16:1</b> | 1.242  | 0.983  | 0.702  | 1.066  | 0.566  | 0.825  | 0.822  | 0.508  | 0.400  | 0.906  | 0.862  | 0.899  | 1.346  | 0.911  | 0.970  | 0.724  | 0.803  | 0.699 | 0.386  | 0.753  |
| <b>SM OH C22:1</b> | 0.614  | 0.411  | 0.431  | 0.659  | 0.286  | 0.507  | 0.546  | 0.351  | 0.265  | 0.539  | 0.494  | 0.339  | 0.950  | 0.586  | 0.436  | 0.436  | 0.350  | 0.499 | 0.194  | 0.545  |

|                    |        |        |        |        |        |        |        |        |        |        |        |        |        |        |        |        |        |        |        |        |
|--------------------|--------|--------|--------|--------|--------|--------|--------|--------|--------|--------|--------|--------|--------|--------|--------|--------|--------|--------|--------|--------|
| <b>SM OH C22:2</b> | 0.811  | 0.612  | 0.521  | 0.551  | 0.350  | 0.728  | 0.545  | 0.281  | 0.236  | 0.555  | 0.693  | 0.581  | 0.959  | 0.687  | 0.592  | 0.412  | 0.513  | 0.615  | 0.229  | 0.437  |
| <b>SM OH C24:1</b> | 0.076  | 0.018  | 0.057  | 0.061  | 0.008  | 0.033  | 0.086  | 0.051  | 0.025  | 0.037  | 0.040  | 0.080  | 0.070  | 0.061  | 0.032  | 0.041  | 0.044  | 0.045  | 0.023  | 0.035  |
| <b>SM C16:0</b>    | 49.881 | 46.158 | 36.919 | 65.917 | 29.959 | 42.706 | 54.322 | 45.173 | 32.254 | 45.278 | 53.135 | 65.025 | 60.646 | 43.708 | 44.344 | 43.623 | 84.369 | 45.828 | 23.762 | 40.328 |
| <b>SM C16:1</b>    | 6.007  | 6.312  | 4.967  | 7.828  | 3.863  | 6.832  | 6.698  | 4.912  | 4.799  | 8.140  | 7.427  | 9.566  | 10.533 | 6.283  | 6.248  | 5.930  | 10.400 | 6.637  | 2.341  | 4.956  |
| <b>SM C18:0</b>    | 6.278  | 4.901  | 3.097  | 5.146  | 3.586  | 4.042  | 4.386  | 2.351  | 1.825  | 6.121  | 5.658  | 2.328  | 8.209  | 4.558  | 6.372  | 3.567  | 3.666  | 3.442  | 1.413  | 3.497  |
| <b>SM C18:1</b>    | 2.688  | 2.184  | 1.322  | 2.107  | 1.622  | 2.112  | 1.856  | 1.076  | 1.136  | 3.219  | 2.768  | 1.420  | 4.639  | 2.178  | 3.151  | 1.774  | 1.842  | 1.947  | 0.591  | 1.583  |
| <b>SM C20:2</b>    | 0.109  | 0.092  | 0.060  | 0.121  | 0.068  | 0.081  | 0.096  | 0.037  | 0.034  | 0.136  | 0.079  | 0.084  | 0.189  | 0.092  | 0.084  | 0.081  | 0.081  | 0.087  | 0.041  | 0.038  |
| <b>SM C22:3</b>    | 0.005  | 0.045  | 0.044  | 0.150  | 0.014  | 0.005  | 0.044  | 0.006  | 0.033  | 0.005  | 0.036  | 0.054  | 0.005  | 0.005  | 0.005  | 0.015  | 0.039  | 0.032  | 0.005  | 0.005  |
| <b>SM C24:0</b>    | 0.728  | 0.820  | 0.692  | 1.155  | 0.489  | 0.705  | 0.892  | 0.811  | 0.605  | 0.860  | 0.956  | 1.028  | 1.364  | 0.809  | 0.776  | 0.594  | 0.841  | 0.777  | 0.525  | 1.160  |
| <b>SM C24:1</b>    | 3.269  | 3.244  | 3.025  | 3.294  | 2.030  | 2.800  | 3.004  | 2.477  | 2.491  | 3.166  | 4.045  | 3.913  | 3.571  | 2.449  | 2.476  | 2.409  | 3.726  | 3.823  | 1.756  | 2.590  |
| <b>SM C26:1</b>    | 0.013  | 0.021  | 0.012  | 0.011  | 0.005  | 0.025  | 0.004  | 0.018  | 0.016  | 0.021  | 0.023  | 0.007  | 0.020  | 0.036  | 0.018  | 0.014  | 0.001  | 0.014  | 0.001  | 0.017  |
| <b>C0</b>          | 71.405 | 32.324 | 58.249 | 270.49 | 17.512 | 25.005 | 115.62 | 55.907 | 110.21 | 17.337 | 52.166 | 112.81 | 75.522 | 49.983 | 59.642 | 69.854 | 101.77 | 66.351 | 110.63 | 28.718 |
| <b>C2</b>          | 11.424 | 2.782  | 5.094  | 34.921 | 1.529  | 2.523  | 9.413  | 3.741  | 9.223  | 2.836  | 6.984  | 22.734 | 6.993  | 3.711  | 5.619  | 7.352  | 21.904 | 8.323  | 15.557 | 2.299  |
| <b>C4</b>          | 1.058  | 0.645  | 0.622  | 7.272  | 0.227  | 0.632  | 0.767  | 0.263  | 0.441  | 0.272  | 0.524  | 1.371  | 0.765  | 0.520  | 0.699  | 0.374  | 1.543  | 0.949  | 1.686  | 0.784  |

**Table S3** –Comparisons of metabolite concentrations measured at day 1 and day 7 in survivors (S) and non survivors (NS) in relationship to outcome at day 28 and 90. The values are reported as  $\mu\text{M}$  median (25 ,75 percentile).

|                     | Metabolite  | D1                          | D7                          | pValue | FDR               |
|---------------------|-------------|-----------------------------|-----------------------------|--------|-------------------|
| 28 day<br>Survivors | LPC a C16:1 | 0.657 (0.334, 0.970)        | 2.369 (1.598, 2.882)        | 0.042  | <10 <sup>-6</sup> |
|                     | LPC a C18:2 | 2.005 (1.488, 3.144)        | 8.158 (5.488, 14.161)       | 0.024  | <10 <sup>-6</sup> |
|                     | LPC a C20:3 | 0.302 (0.265, 0.456)        | 1.008 (0.551, 1.402)        | 0.042  | <10 <sup>-6</sup> |
|                     | LPC a C24:0 | 0.054 (0.049, 0.069)        | 0.096 (0.086, 0.108)        | 0.002  | <10 <sup>-6</sup> |
|                     | LPC a C28:1 | 0.095 (0.067, 0.115)        | 0.138 (0.113, 0.142)        | 0.014  | 0.029             |
|                     | PC aa C30:0 | 2.643 (2.100, 3.107)        | 3.987 (3.133, 4.243)        | 0.010  | 0.002             |
|                     | PC aa C32:2 | 19.743 (13.202, 29.768)     | 30.674 (22.532, 2.543)      | 0.032  | 0.004             |
|                     | PC aa C32:3 | 2.228 (1.799, 2.920)        | 3.486 (2.769, 4.240)        | 0.007  | <10 <sup>-6</sup> |
|                     | PC aa C34:1 | 1584.852(1220.297,2106.714) | 2088.467(1951.806,2322.050) | 0.010  | 0.005             |
|                     | PC aa C34:3 | 51.173 (47.713, 83.221)     | 115.731 (85.118, 143.073)   | 0.001  | <10 <sup>-6</sup> |
|                     | PC aa C34:4 | 3.737 (2.793, 5.619)        | 8.604 (6.879, 11.438)       | 0.001  | <10 <sup>-6</sup> |
|                     | PC aa C36:1 | 119.836 (88.519, 152.720)   | 224.959 ( 153.382, 259.225) | 0.001  | <10 <sup>-6</sup> |
|                     | PC aa C36:3 | 370.840 (212.091, 423.921)  | 496.138 (321.304, 550.808)  | 0.010  | <10 <sup>-6</sup> |
|                     | PC aa C36:5 | 47.169 (25.900, 60.058)     | 66.158 ( 49.468, 100.254)   | 0.003  | 0.004             |
|                     | PC aa C36:6 | 1.938 ( 1.424, 2.404)       | 3.006 (2.317, 3.657)        | 0.001  | <10 <sup>-6</sup> |
|                     | PC aa C38:0 | 3.923 (2.245, 4.807)        | 4.631 (4.197, 6.211)        | 0.005  | 0.001             |
|                     | PC aa C38:1 | 0.757 (0.499, 0.936)        | 1.762 (0.880, 2.387)        | 0.032  | <10 <sup>-6</sup> |
|                     | PC aa C38:3 | 70.838 (55.566, 80.983)     | 104.071 ( 71.839, 114.423)  | 0.024  | <10 <sup>-6</sup> |
|                     | PC aa C38:6 | 164.022 (131.032, 174.123)  | 125.796 ( 69.163, 152.805)  | 0.007  | 0.007             |
|                     | PC aa C40:2 | 0.587 (0.459, 0.617)        | 0.749 (0.554, 0.837)        | 0.024  | <10 <sup>-6</sup> |
|                     | PC aa C40:3 | 0.667 (0.442, 0.746)        | 0.839 (0.625, 1.142)        | 0.032  | 0.002             |
|                     | PC aa C40:6 | 35.123 (29.514, 45.323)     | 30.574 (14.082, 37.011)     | 0.014  | 0.011             |
|                     | PC aa C42:0 | 0.353 ( 0.269, 0.474)       | 0.447 ( 0.433, 0.483)       | 0.032  | 0.001             |
|                     | PC aa C42:2 | 0.186 (0.111, 0.221)        | 0.222 (0.197, 0.284)        | 0.019  | 0.009             |
|                     | PC ae C30:0 | 0.191 (0.168, 0.249)        | 0.293 (0.259, 0.355)        | 0.001  | <10 <sup>-6</sup> |
|                     | PC ae C30:2 | 0.050 (0.038, 0.063)        | 0.064 (0.055, 0.073)        | 0.042  | 0.001             |
|                     | PC ae C32:1 | 17.536 (13.172, 20.064)     | 31.071 (27.207, 35.019)     | 0.001  | <10 <sup>-6</sup> |
|                     | PC ae C32:2 | 4.447 (3.488, 4.934)        | 7.687 (6.197, 7.876)        | 0.001  | <10 <sup>-6</sup> |
|                     | PC ae C34:0 | 7.193 (6.203, 8.575)        | 8.494 (6.944, 10.921)       | 0.003  | 0.007             |
|                     | PC ae C34:1 | 59.345 ( 49.166, 83.804)    | 94.683 (91.369, 99.636)     | 0.001  | <10 <sup>-6</sup> |
|                     | PC ae C34:2 | 30.843 (26.433, 51.014)     | 56.235 (46.754, 70.845)     | 0.002  | <10 <sup>-6</sup> |
|                     | PC ae C34:3 | 13.078 (11.832, 21.026)     | 26.979 ( 20.127, 31.112)    | 0.002  | 0.001             |
|                     | PC ae C36:1 | 29.252 (27.332, 35.611)     | 36.215 (34.598, 44.674)     | 0.001  | 0.002             |
|                     | PC ae C36:2 | 42.687 (26.313, 50.523)     | 48.006 (41.721, 67.285)     | 0.019  | 0.002             |
|                     | PC ae C36:3 | 14.781 (13.913, 22.977)     | 30.411 ( 26.438, 34.159)    | 0.001  | <10 <sup>-6</sup> |
|                     | PC ae C36:4 | 36.338 (25.118, 41.717)     | 56.323 (49.987, 68.038)     | 0.005  | 0.002             |
|                     | PC ae C36:5 | 24.506 (18.209, 33.656)     | 40.009 (31.119, 46.427)     | 0.005  | <10 <sup>-6</sup> |
|                     | PC ae C38:0 | 2.633 (2.418, 3.202)        | 3.935 ( 2.199, 4.428)       | 0.019  | 0.005             |
|                     | PC ae C38:2 | 3.782 ( 3.243, 4.376)       | 5.093 ( 4.571, 5.623)       | 0.042  | <10 <sup>-6</sup> |
|                     | PC ae C38:4 | 21.815 (19.163, 29.019)     | 32.925 (27.312, 39.966)     | 0.005  | 0.001             |

|                                 |                       |                             |                             |       |                   |
|---------------------------------|-----------------------|-----------------------------|-----------------------------|-------|-------------------|
|                                 | PC ae C38:5           | 26.705 (20.230, 38.512)     | 46.380 (42.053, 57.879)     | 0.003 | <10 <sup>-6</sup> |
|                                 | PC ae C38:6           | 10.553 (7.503, 12.944)      | 14.374 (12.127, 16.152)     | 0.005 | 0.021             |
|                                 | PC ae C40:1           | 0.911 (0.625, 1.288)        | 1.633 (1.209, 1.706)        | 0.024 | <10 <sup>-6</sup> |
|                                 | PC ae C40:4           | 2.479 (1.800, 3.645)        | 3.887 (3.257, 4.322)        | 0.032 | <10 <sup>-6</sup> |
|                                 | PC ae C40:6           | 4.665 (4.198, 5.979)        | 7.228 ( 5.338, 8.149)       | 0.003 | <10 <sup>-6</sup> |
|                                 | PC ae C42:1           | 0.533 (0.500, 0.654)        | 0.571 ( 0.543, 0.703)       | 0.032 | 0.016             |
|                                 | PC ae C42:4           | 0.351 (0.285, 0.519)        | 0.788 ( 0.679, 0.892)       | 0.001 | <10 <sup>-6</sup> |
|                                 | PC ae C42:5           | 1.353 ( 1.140, 2.094)       | 2.108 ( 1.848, 2.740)       | 0.042 | <10 <sup>-6</sup> |
|                                 | PC ae C44:5           | 0.459 ( 0.365, 0.642)       | 0.720 ( 0.624, 0.945)       | 0.003 | <10 <sup>-6</sup> |
|                                 | PC ae C44:6           | 0.462 ( 0.301, 0.564)       | 0.785 ( 0.650, 0.913)       | 0.005 | <10 <sup>-6</sup> |
|                                 | Sugars                | 6874.293(5010.346,7644.496) | 8079.666(7393.151,9977.130) | 0.024 | <10 <sup>-6</sup> |
|                                 | Arg                   | 73.000 (42.975, 93.950)     | 123.000 (96.550, 220.250)   | 0.019 | 0.002             |
|                                 | Ser                   | 38.300 (36.125, 137.750)    | 110.000 ( 105.250, 161.750) | 0.005 | 0.009             |
|                                 | Creatinine            | 230.000 ( 131.500, 275.500) | 109.000 (72.400, 167.000)   | 0.024 | 0.06              |
|                                 | Kynurenine            | 12.300 ( 6.287, 18.675)     | 7.680 ( 4.965, 8.735)       | 0.014 | 0.003             |
|                                 | Spermidine            | 0.076 ( 0.045, 0.113)       | 0.132 ( 0.061, 0.237)       | 0.042 | <10 <sup>-6</sup> |
|                                 | SM OH C24:1           | 0.033 ( 0.023, 0.049)       | 0.045 ( 0.033, 0.068)       | 0.032 | <10 <sup>-6</sup> |
|                                 | SM C16:0              | 35.687 (29.140, 40.569)     | 45.278 (43.867, 48.950)     | 0.001 | <10 <sup>-6</sup> |
|                                 | SM C24:0              | 0.599 ( 0.536, 0.710)       | 0.811 ( 0.776, 0.884)       | 0.002 | <10 <sup>-6</sup> |
|                                 | SM C24:1              | 1.740 ( 1.397, 2.737)       | 3.004 ( 2.481, 3.262)       | 0.014 | <10 <sup>-6</sup> |
|                                 | SM C26:1              | 0.007 ( 0.004, 0.012)       | 0.018 ( 0.015, 0.021)       | 0.019 | <10 <sup>-6</sup> |
|                                 | C0                    | 32.785 (26.392, 64.080)     | 59.642 (36.739, 74.493)     | 0.024 | 0.039             |
|                                 | C4                    | 0.325 ( 0.190, 0.464)       | 0.699 ( 0.461, 0.780)       | 0.014 | 0.007             |
| <b>28 day<br/>Non survivors</b> | LPC a C16:0           | 10.370 ( 4.895, 14.712)     | 18.150 (14.455, 33.212)     | 0.083 | 0.001             |
|                                 | LPC a C16:1           | 0.313 ( 0.291, 0.591)       | 1.121 ( 0.729, 1.598)       | 0.042 | <10 <sup>-6</sup> |
|                                 | LPC a C17:0           | 0.134 (0.129, 0.287)        | 0.339 ( 0.277, 0.499)       | 0.054 | <10 <sup>-6</sup> |
|                                 | LPC a C18:0           | 1.944 ( 1.592, 3.925)       | 5.684 ( 3.502, 7.111)       | 0.102 | <10 <sup>-6</sup> |
|                                 | LPC a C18:1           | 2.778 ( 2.336, 4.090)       | 10.772 ( 7.079, 13.577)     | 0.054 | <10 <sup>-6</sup> |
|                                 | LPC a C18:2           | 2.774 ( 1.732, 3.356)       | 6.823 ( 4.963, 11.632)      | 0.024 | <10 <sup>-6</sup> |
|                                 | LPC a C20:3           | 0.299 ( 0.272, 0.424)       | 0.872 ( 0.469, 1.070)       | 0.042 | <10 <sup>-6</sup> |
|                                 | LPC a C20:4           | 0.799 ( 0.551, 1.330)       | 1.240 ( 0.927, 2.547)       | 0.147 | 0.003             |
|                                 | PC aa C34:3           | 64.763 (37.269, 67.939)     | 69.660 (53.522,130.180)     | 0.001 | 0.017             |
|                                 | PC aa C34:4           | 2.938 ( 2.056, 4.127)       | 4.150 ( 3.464, 5.720)       | 0.001 | <10 <sup>-6</sup> |
|                                 | PC aa C36:1           | 140.121(125.770,199.256)    | 196.723(165.908,288.444)    | 0.001 | 0.018             |
|                                 | PC aa C36:3           | 258.872(197.825,317.018)    | 433.000(359.777,522.048)    | 0.01  | <10 <sup>-6</sup> |
|                                 | PC aa C36:5           | 23.315 (18.012, 32.114)     | 32.121 (24.778, 41.738)     | 0.003 | 0.008             |
|                                 | PC aa C38:0           | 2.960 ( 2.351, 4.645)       | 4.617 ( 2.616, 7.852)       | 0.005 | 0.035             |
|                                 | PC aa C38:3           | 42.068 (37.633, 64.861)     | 82.570 (56.981, 90.807)     | 0.024 | <10 <sup>-6</sup> |
|                                 | PC aa C40:3           | 0.553 ( 0.355, 0.736)       | 0.830 ( 0.739, 1.355)       | 0.032 | <10 <sup>-6</sup> |
|                                 | PC ae C32:1           | 19.215 (15.072, 24.007)     | 31.845 (19.133, 42.121)     | 0.001 | 0.003             |
|                                 | PC ae C32:2           | 4.071 ( 3.062, 4.709)       | 5.572 ( 3.838, 7.075)       | 0.001 | 0.02              |
|                                 | PC ae C36:3           | 17.890 (15.506, 22.661)     | 30.503 (17.954, 34.548)     | 0.001 | 0.001             |
|                                 | PC ae C36:4           | 38.104 (24.308, 47.422)     | 57.318 (30.265, 84.216)     | 0.005 | 0.009             |
| PC ae C38:1                     | 1.831 ( 0.998, 2.362) | 2.663 ( 1.536, 3.161)       | 0.175                       | 0.001 |                   |



|                         |             |                             |                             |       |                   |
|-------------------------|-------------|-----------------------------|-----------------------------|-------|-------------------|
|                         | PC ae C38:5 | 26.187 (20.196, 42.159)     | 47.061 (29.391, 76.883)     | 0.003 | 0.017             |
|                         | PC ae C38:6 | 10.131 ( 6.256, 13.957)     | 11.101 ( 7.714, 20.996)     | 0.005 | 0.017             |
|                         | PC ae C40:2 | 1.397 ( 1.144, 1.595)       | 2.052 ( 1.883, 2.354)       | 0.102 | <10 <sup>-6</sup> |
|                         | PC ae C40:4 | 2.296 ( 1.881, 3.069)       | 3.145 ( 3.056, 4.077)       | 0.032 | <10 <sup>-6</sup> |
|                         | PC ae C40:6 | 4.566 ( 2.631, 5.672)       | 6.216 ( 3.154, 9.969)       | 0.003 | 0.004             |
|                         | PC ae C42:3 | 0.495 ( 0.349, 0.557)       | 0.648 ( 0.449, 0.685)       | 0.147 | 0.009             |
|                         | PC ae C42:4 | 0.367 ( 0.242, 0.592)       | 0.608 ( 0.487, 0.663)       | 0.001 | <10 <sup>-6</sup> |
|                         | PC ae C44:4 | 0.123 ( 0.092, 0.154)       | 0.206 ( 0.167, 0.268)       | 0.240 | <10 <sup>-6</sup> |
|                         | PC ae C44:5 | 0.419 ( 0.362, 0.691)       | 0.694 ( 0.411, 0.992)       | 0.003 | 0.005             |
|                         | PC ae C44:6 | 0.403 ( 0.270, 0.592)       | 0.452 ( 0.387, 0.908)       | 0.005 | 0.004             |
|                         | Asn         | 47.100 (22.092, 78.025)     | 66.400 (36.150,103.275)     | 0.147 | 0.116             |
|                         | Cit         | 10.800 ( 6.995, 22.850)     | 22.900 (14.875, 28.300)     | 0.175 | 0.067             |
|                         | Glu         | 74.900 (51.350,115.150)     | 97.100 (63.075,274.000)     | 0.175 | 0.004             |
|                         | Thr         | 76.800 (54.025,143.250)     | 139.000(132.500,199.250)    | 0.054 | 0.001             |
|                         | Trp         | 24.500 (12.950, 44.250)     | 63.400 (53.650, 84.050)     | 0.067 | <10 <sup>-6</sup> |
|                         | Tyr         | 79.800 (66.400,143.250)     | 111.000 (70.850,190.000)    | 0.102 | 0.023             |
|                         | Putrescine  | 0.175 ( 0.113, 0.346)       | 0.311 ( 0.277, 0.950)       | 0.175 | <10 <sup>-6</sup> |
|                         | SM OH:C22:2 | 0.384 ( 0.244, 0.453)       | 0.521 ( 0.397, 0.609)       | 0.320 | <10 <sup>-6</sup> |
|                         | SM C24:0    | 0.471 ( 0.427, 0.582)       | 0.705 ( 0.576, 0.974)       | 0.002 | 0.001             |
|                         | SM C24:1    | 1.865 ( 1.561, 2.446)       | 3.025 ( 2.315, 3.773)       | 0.014 | <10 <sup>-6</sup> |
| <b>90 day survivors</b> | LPC a C16:0 | 20.493 ( 6.240, 28.505)     | 47.046 (30.166, 56.350)     | 0.012 | <10 <sup>-6</sup> |
|                         | LPC a C16:1 | 0.657 ( 0.314, 0.967)       | 2.369 ( 2.038, 2.945)       | 0.004 | 0.0001            |
|                         | LPC a C17:0 | 0.389 ( 0.117, 0.422)       | 0.709 ( 0.492, 1.008)       | 0.004 | <10 <sup>-6</sup> |
|                         | LPC a C18:0 | 4.364 ( 1.679, 6.895)       | 10.807 ( 7.946, 15.048)     | 0.020 | <10 <sup>-6</sup> |
|                         | LPC a C18:1 | 3.481 ( 1.864, 4.443)       | 14.485 ( 9.271, 19.880)     | 0.004 | <10 <sup>-6</sup> |
|                         | LPC a C18:2 | 2.005 ( 1.450, 2.996)       | 8.158 ( 5.590, 15.761)      | 0.004 | <10 <sup>-6</sup> |
|                         | LPC a C20:3 | 0.292 ( 0.236, 0.347)       | 1.008 ( 0.681, 1.360)       | 0.004 | <10 <sup>-6</sup> |
|                         | LPC a C20:4 | 1.104 ( 0.583, 1.706)       | 2.068 ( 1.887, 3.014)       | 0.039 | <10 <sup>-6</sup> |
|                         | LPC a C24:0 | 0.054 ( 0.051, 0.073)       | 0.102 ( 0.091, 0.111)       | 0.008 | <10 <sup>-6</sup> |
|                         | PC aa C30:0 | 2.887 ( 2.184, 3.229)       | 4.051 ( 3.190, 4.391)       | 0.027 | 0.0001            |
|                         | PC aa C32:3 | 2.629 ( 1.924, 3.040)       | 3.830 ( 3.359, 4.484)       | 0.008 | 0.0002            |
|                         | PC aa C34:1 | 1661.861(1332.177,2243.574) | 2314.398(1781.097,2331.305) | 0.039 | 0.0306            |
|                         | PC aa C34:3 | 74.940 (47.836, 87.092)     | 127.871 (108.386, 145.765)  | 0.004 | <10 <sup>-6</sup> |
|                         | PC aa C34:4 | 5.129 ( 2.815, 5.778)       | 8.734 ( 8.351, 12.263)      | 0.004 | <10 <sup>-6</sup> |
|                         | PC aa C36:1 | 119.836 (92.375, 160.676)   | 230.499 (159.540, 286.958)  | 0.004 | 0.0001            |
|                         | PC aa C36:3 | 349.441 (205.233, 434.395)  | 501.059 (355.874, 588.700)  | 0.004 | 0.0032            |
|                         | PC aa C36:5 | 51.571 (28.557, 62.269)     | 77.650 (51.325, 107.588)    | 0.004 | 0.0299            |
|                         | PC aa C36:6 | 2.110 ( 1.630, 2.435)       | 3.110 ( 2.554, 3.759)       | 0.004 | <10 <sup>-6</sup> |
|                         | PC aa C38:0 | 3.923 ( 2.261, 4.950)       | 4.631 ( 4.092, 6.526)       | 0.008 | 0.0013            |
|                         | PC aa C38:3 | 70.838 (49.837, 82.160)     | 109.532 (73.397, 118.475)   | 0.008 | 0.0006            |
|                         | PC aa C38:6 | 165.706 (137.786, 182.901)  | 125.796 (88.175, 152.147)   | 0.004 | <10 <sup>-6</sup> |
|                         | PC aa C40:2 | 0.587 ( 0.464, 0.615)       | 0.761 ( 0.563, 0.871)       | 0.008 | 0.0004            |
|                         | PC aa C40:3 | 0.667 ( 0.458, 0.705)       | 0.874 ( 0.685, 1.240)       | 0.004 | <10 <sup>-6</sup> |
|                         | PC aa C40:6 | 36.449 (30.209, 48.550)     | 34.100 (15.915, 38.200)     | 0.008 | 0.0012            |
|                         | PC aa C42:0 | 0.439 ( 0.280, 0.482)       | 0.449 ( 0.443, 0.564)       | 0.027 | 0.0014            |
|                         | PC ae C30:0 | 0.191 ( 0.171, 0.266)       | 0.301 ( 0.279, 0.368)       | 0.004 | 0.0001            |

|                                 |             |                          |                           |       |                   |
|---------------------------------|-------------|--------------------------|---------------------------|-------|-------------------|
|                                 | PC ae C32:1 | 19.308 (12.970, 21.214)  | 32.126 (29.141, 36.308)   | 0.004 | <10 <sup>-6</sup> |
|                                 | PC ae C32:2 | 4.658 ( 3.830, 5.043)    | 7.789 ( 6.580, 8.058)     | 0.004 | <10 <sup>-6</sup> |
|                                 | PC ae C34:0 | 7.454 ( 6.794, 8.686)    | 8.494 ( 7.066, 10.538)    | 0.012 | 0.0993            |
|                                 | PC ae C34:1 | 64.332 (49.957, 89.897)  | 94.683 (87.988, 99.308)   | 0.004 | <10 <sup>-6</sup> |
|                                 | PC ae C34:2 | 39.549 (26.458, 51.424)  | 66.512 (45.191, 73.459)   | 0.008 | <10 <sup>-6</sup> |
|                                 | PC ae C34:3 | 16.469 (12.735, 24.496)  | 27.981 (19.421, 34.634)   | 0.008 | 0.0007            |
|                                 | PC ae C36:1 | 29.252 (25.934, 36.417)  | 36.215 (32.284, 46.770)   | 0.004 | 0.0048            |
|                                 | PC ae C36:3 | 20.314 (13.152, 23.485)  | 30.411 (25.929, 35.015)   | 0.004 | <10 <sup>-6</sup> |
|                                 | PC ae C36:4 | 37.012 (25.418, 44.739)  | 56.323 (50.261, 70.762)   | 0.008 | <10 <sup>-6</sup> |
|                                 | PC ae C36:5 | 25.894 (19.388, 35.713)  | 40.898 (35.736, 46.563)   | 0.008 | 0.0001            |
|                                 | PC ae C38:0 | 2.633 ( 2.293, 3.450)    | 3.935 ( 2.699, 4.504)     | 0.004 | 0.0009            |
|                                 | PC ae C38:2 | 3.782 ( 2.991, 4.280)    | 5.093 ( 4.526, 5.410)     | 0.004 | <10 <sup>-6</sup> |
|                                 | PC ae C38:3 | 8.716 ( 7.298, 9.934)    | 11.620 (10.357, 12.716)   | 0.020 | 0.0001            |
|                                 | PC ae C38:4 | 24.382 (19.702, 30.294)  | 32.925 (27.359, 40.637)   | 0.008 | <10 <sup>-6</sup> |
|                                 | PC ae C38:5 | 26.705 (23.134, 37.272)  | 46.380 (42.331, 57.167)   | 0.004 | <10 <sup>-6</sup> |
|                                 | PC ae C38:6 | 11.348 ( 8.556, 13.390)  | 14.374 (12.378, 17.236)   | 0.008 | <10 <sup>-6</sup> |
|                                 | PC ae C40:1 | 0.911 ( 0.654, 1.276)    | 1.669 ( 1.345, 1.731)     | 0.004 | <10 <sup>-6</sup> |
|                                 | PC ae C40:2 | 1.775 ( 1.520, 2.060)    | 2.253 ( 2.007, 2.331)     | 0.020 | 0.0003            |
|                                 | PC ae C40:4 | 2.479 ( 1.942, 3.453)    | 3.887 ( 3.151, 4.649)     | 0.004 | 0.0001            |
|                                 | PC ae C40:5 | 3.743 ( 3.189, 5.868)    | 6.705 ( 5.842, 8.646)     | 0.012 | <10 <sup>-6</sup> |
|                                 | PC ae C40:6 | 4.665 ( 4.241, 6.474)    | 7.228 ( 5.691, 8.613)     | 0.004 | <10 <sup>-6</sup> |
|                                 | PC ae C42:1 | 0.533 ( 0.503, 0.588)    | 0.571 ( 0.544, 0.730)     | 0.020 | 0.0002            |
|                                 | PC ae C42:3 | 0.651 ( 0.433, 0.695)    | 0.834 ( 0.685, 0.895)     | 0.039 | <10 <sup>-6</sup> |
|                                 | PC ae C42:4 | 0.336 ( 0.277, 0.563)    | 0.788 ( 0.640, 0.967)     | 0.004 | <10 <sup>-6</sup> |
|                                 | PC ae C42:5 | 1.353 ( 1.068, 1.924)    | 2.108 ( 1.883, 3.001)     | 0.008 | <10 <sup>-6</sup> |
|                                 | PC ae C44:4 | 0.153 ( 0.117, 0.185)    | 0.237 ( 0.210, 0.261)     | 0.012 | <10 <sup>-6</sup> |
|                                 | PC ae C44:5 | 0.459 ( 0.339, 0.683)    | 0.720 ( 0.675, 0.934)     | 0.004 | <10 <sup>-6</sup> |
|                                 | PC ae C44:6 | 0.462 ( 0.296, 0.612)    | 0.883 ( 0.747, 0.929)     | 0.008 | <10 <sup>-6</sup> |
|                                 | Ser         | 38.300 (35.375, 123.250) | 110.000(107.750, 157.250) | 0.020 | <10 <sup>-6</sup> |
|                                 | Kynurenine  | 12.700 ( 9.527, 20.550)  | 8.160 ( 4.525, 9.050)     | 0.004 | 0.0046            |
|                                 | SM C16:0    | 35.687 (31.117, 39.300)  | 45.278 (42.863, 48.199)   | 0.004 | <10 <sup>-6</sup> |
|                                 | SM C24:0    | 0.599 ( 0.546, 0.659)    | 0.820 ( 0.777, 0.959)     | 0.008 | <10 <sup>-6</sup> |
|                                 | SM C24:1    | 1.740 ( 1.480, 2.334)    | 3.004 ( 2.487, 3.326)     | 0.027 | <10 <sup>-6</sup> |
|                                 | C0          | 30.205 (26.021, 72.807)  | 59.642 (31.423, 84.194)   | 0.039 | 0.0064            |
|                                 | C4          | 0.239 ( 0.179, 0.523)    | 0.699 ( 0.501, 0.771)     | 0.020 | 0.0004            |
| <b>90 day<br/>non survivors</b> | LPC a C16:1 | 0.467 (0.304, 0.600)     | 1.121 (0.663, 1.693)      | 0.042 | 0.0004            |
|                                 | LPC a C18:1 | 2.778 (2.344, 4.281)     | 10.772 (6.298, 15.129)    | 0.042 | 0.0015            |
|                                 | LPC a C18:2 | 2.774 (1.645, 3.724)     | 6.823 (5.136, 9.972)      | 0.042 | 0.0003            |
|                                 | LPC a C20:3 | 0.331 (0.280, 0.493)     | 0.872 (0.427, 1.234)      | 0.042 | 0.0004            |
|                                 | LPC a C24:0 | 0.057 (0.045, 0.066)     | 0.075 (0.063, 0.086)      | 0.032 | 0.0018            |
|                                 | PC aa C30:0 | 2.706 (1.683, 3.136)     | 3.080 (2.798, 3.889)      | 0.019 | 0.0003            |
|                                 | PC aa C34:3 | 51.173( 38.172, 65.232)  | 69.660 (54.518,120.784)   | 0.003 | 0.0060            |
|                                 | PC aa C34:4 | 2.938 (2.173, 3.918)     | 4.150 (3.052, 6.233)      | 0.010 | 0.0071            |
|                                 | PC aa C36:1 | 139.266(118.402,180.754) | 196.723(158.202,263.745)  | 0.005 | 0.0003            |
|                                 | PC aa C36:3 | 274.335(199.691,366.813) | 433.000(311.672,512.101)  | 0.014 | 0.0003            |
|                                 | PC aa C36:5 | 24.106( 19.734, 33.696)  | 32.121 (22.740, 46.197)   | 0.019 | 0.0002            |

|             |                          |                          |       |        |
|-------------|--------------------------|--------------------------|-------|--------|
| PC aa C36:6 | 1.356 (0.956, 1.712)     | 1.796 (1.323, 2.327)     | 0.019 | 0.0023 |
| PC aa C38:0 | 2.960 (2.289, 4.371)     | 4.617 (3.015, 6.795)     | 0.014 | 0.0021 |
| PC aa C38:3 | 60.488( 39.854, 72.910)  | 82.570 (52.842, 89.717)  | 0.042 | 0.0021 |
| PC aa C40:3 | 0.553 (0.359, 0.807)     | 0.809 (0.703, 1.226)     | 0.042 | 0.0021 |
| PC ae C32:1 | 16.370( 13.753, 22.372)  | 27.758 (19.987, 39.248)  | 0.002 | 0.0011 |
| PC ae C32:2 | 3.726 (3.195, 4.541)     | 5.572 (4.072, 6.091)     | 0.007 | 0.0073 |
| PC ae C34:1 | 72.656( 55.115, 92.360)  | 102.178 (68.687,140.645) | 0.024 | 0.0070 |
| PC ae C34:2 | 33.998( 30.948, 40.357)  | 52.748 (39.338, 62.845)  | 0.019 | 0.0048 |
| PC ae C34:3 | 13.514( 11.361, 16.914)  | 18.108 (15.988, 20.480)  | 0.032 | 0.0011 |
| PC ae C36:3 | 17.322( 14.259, 21.675)  | 30.503 (20.596, 34.276)  | 0.002 | 0.0002 |
| PC ae C36:4 | 35.296( 24.735, 44.830)  | 57.318 (31.729, 74.544)  | 0.024 | 0.0149 |
| PC ae C38:1 | 1.831 (0.991, 2.504)     | 2.663 (1.503, 3.175)     | 0.014 | 0.0384 |
| PC ae C38:4 | 21.008( 15.112, 23.583)  | 29.200 (17.373, 37.837)  | 0.042 | 0.0021 |
| PC ae C38:5 | 26.187( 19.205, 42.096)  | 47.061 (30.967, 67.401)  | 0.010 | 0.0122 |
| PC ae C38:6 | 10.131 (6.325, 13.062)   | 11.101 (8.331, 19.357)   | 0.019 | 0.0270 |
| PC ae C40:2 | 1.462 (1.210, 1.705)     | 2.052 (1.840, 2.265)     | 0.032 | 0.0004 |
| PC ae C40:6 | 4.566 (2.800, 5.381)     | 6.216 (3.437, 9.323)     | 0.019 | 0.0025 |
| PC ae C42:4 | 0.379 (0.256, 0.567)     | 0.650 (0.523, 0.747)     | 0.007 | 0.0059 |
| PC ae C44:5 | 0.422 (0.382, 0.660)     | 0.694 (0.417, 0.935)     | 0.019 | 0.0015 |
| PC ae C44:6 | 0.403 (0.275, 0.552)     | 0.452 (0.395, 0.762)     | 0.024 | 0.0071 |
| Asn         | 47.100( 31.325, 77.000)  | 66.400 (38.975, 90.550)  | 0.010 | 0.0116 |
| Cit         | 12.300 (7.825, 26.125)   | 24.000 (16.525, 33.350)  | 0.005 | 0.0070 |
| Glu         | 74.900( 38.775,106.550)  | 97.100 (59.025,298.000)  | 0.007 | 0.0070 |
| Gly         | 183.000(155.250,248.750) | 303.000(241.000,374.750) | 0.042 | 0.0031 |
| Thr         | 76.800( 53.075,165.000)  | 139.000(127.500,207.750) | 0.003 | 0.0048 |
| Trp         | 24.500( 14.400, 51.950)  | 63.400 (52.450, 94.600)  | 0.005 | 0.0011 |
| Tyr         | 79.800( 55.825,153.750)  | 111.000 (75.425,166.750) | 0.019 | 0.0068 |
| Putrescine  | 0.152 (0.034, 0.288)     | 0.290 (0.270, 0.640)     | 0.003 | 0.0004 |
| Spermidine  | 0.072 (0.036, 0.099)     | 0.103 (0.067, 0.130)     | 0.027 | 0.0010 |
| SM OH:C22:2 | 0.384 (0.264, 0.445)     | 0.521 (0.365, 0.665)     | 0.024 | 0.0022 |
| SM C24:0    | 0.471 (0.406, 0.602)     | 0.728 (0.618, 0.927)     | 0.007 | 0.0003 |
| SM C24:1    | 1.865 (1.529, 2.470)     | 3.025 (2.426, 3.618)     | 0.019 | 0.0001 |

**Table S4** – Comparison of the absolute changes in metabolite concentrations ( $\mu\text{M}$ ) from day 1 to day 7 ( $\Delta=\text{D7-D1}$ ) between survivors (S) and non survivors (NS) in relationship to outcome at 28 and 90 day. The signs mean a clear increase ( $\uparrow$ ), a clear decrease ( $\downarrow$ ), or no significant change (=).

|                         | <b>METABOLITE</b> | <b>NS</b>               |              | <b>S</b>                 |              | <b>Pval</b> |
|-------------------------|-------------------|-------------------------|--------------|--------------------------|--------------|-------------|
| <b>28 day mortality</b> | LPC a C24:0       | 0.021 (-0.002, 0.028)   | =            | 0.042 (0.018, 0.049)     | $\uparrow$   | 0,033       |
|                         | LPC a C28:1       | -0.005 (-0.025, 0.009)  | =            | 0.036 (0.005, 0.043)     | $\uparrow$   | 0,048       |
|                         | PC aa C32:3       | 0.212 (0.026, 0.518)    | $\uparrow$   | 1.021 (0.438, 1.556)     | $\uparrow$   | 0,028       |
|                         | PC aa C38:1       | -0.497 (-0.641,-0.131)  | $\downarrow$ | 1.113 (-0.001, 1.646)    | =            | 0,010       |
|                         | PC ae C32:2       | 1.022 (0.191, 1.867)    | $\uparrow$   | 2.657 (1.718, 2.970)     | $\uparrow$   | 0,033       |
|                         | PC ae C34:3       | 3.259 (-0.320, 8.378)   | =            | 10.079 (7.976,11.357)    | $\uparrow$   | 0,040       |
|                         | Kynurenine        | 2.400 (-1.943,11.350)   | =            | -3.390 (-8.805,-0.265)   | $\downarrow$ | 0,019       |
| <b>90 day mortality</b> | LPC a C24:0       | 0.021 (-0.001, 0.029)   | =            | 0.042 (0.022, 0.050)     | $\uparrow$   | 0,040       |
|                         | PC aa C32:3       | 0.212 (-0.094, 0.657)   | =            | 1.061 (0.718, 1.902)     | $\uparrow$   | 0,012       |
|                         | PC aa C34:3       | 18.434 (10.737, 29.888) | $\uparrow$   | 60.933 (29.469, 77.686)  | $\uparrow$   | 0,019       |
|                         | PC aa C34:4       | 2.092 (0.397, 2.575)    | $\uparrow$   | 4.689 (2.657, 6.184)     | $\uparrow$   | 0,048       |
|                         | PC aa C38:1       | -0.446 (-0.618, 0.384)  | =            | 1.113 (-0.108, 1.6711)   | =            | 0,040       |
|                         | PC ae C32:2       | 1.168 (0.387, 2.368)    | $\uparrow$   | 2.679 (1.785, 3.295)     | $\uparrow$   | 0,023       |
|                         | Kynurenine        | 1.880 (-1.500, 6.300)   | =            | -4.540 (-10.870, -2.245) | $\downarrow$ | 0,003       |
